# Supplementary material for: Unexpected cleavage of thiacalix[4]arene sulfoxides
Source: Royal Society of Chemistry journal article supplement (doi:10.1039/c7ra11218a), 2017-01-01
Supplement: c7ra11218a1.pdf [file c7ra11218a1.pdf]

## Unexpected Cleavage of Thiacalix[4]arene Sulfoxides

Jiří Mikšátko<sup>†</sup>, Václav Eigner,<sup>§</sup> and Pavel Lhoták<sup>†\*</sup>

<sup>†</sup>Department of Organic Chemistry, University of Chemistry and Technology, Prague (UCTP), Technická 5, 166 28 Prague 6, Czech Republic

<sup>§</sup>Solid State Department, UCTP, 166 28 Prague 6, Czech Republic

E-mail: [lhotakp@vscht.cz](mailto:lhotakp@vscht.cz)

### Supporting information

#### Table of Contents

|                                      |                |
|--------------------------------------|----------------|
| <b>Spectra of compounds</b>          | <b>p. 2-34</b> |
| <b>X-ray structure of compound 6</b> | <b>p. 35</b>   |

# Compound 4

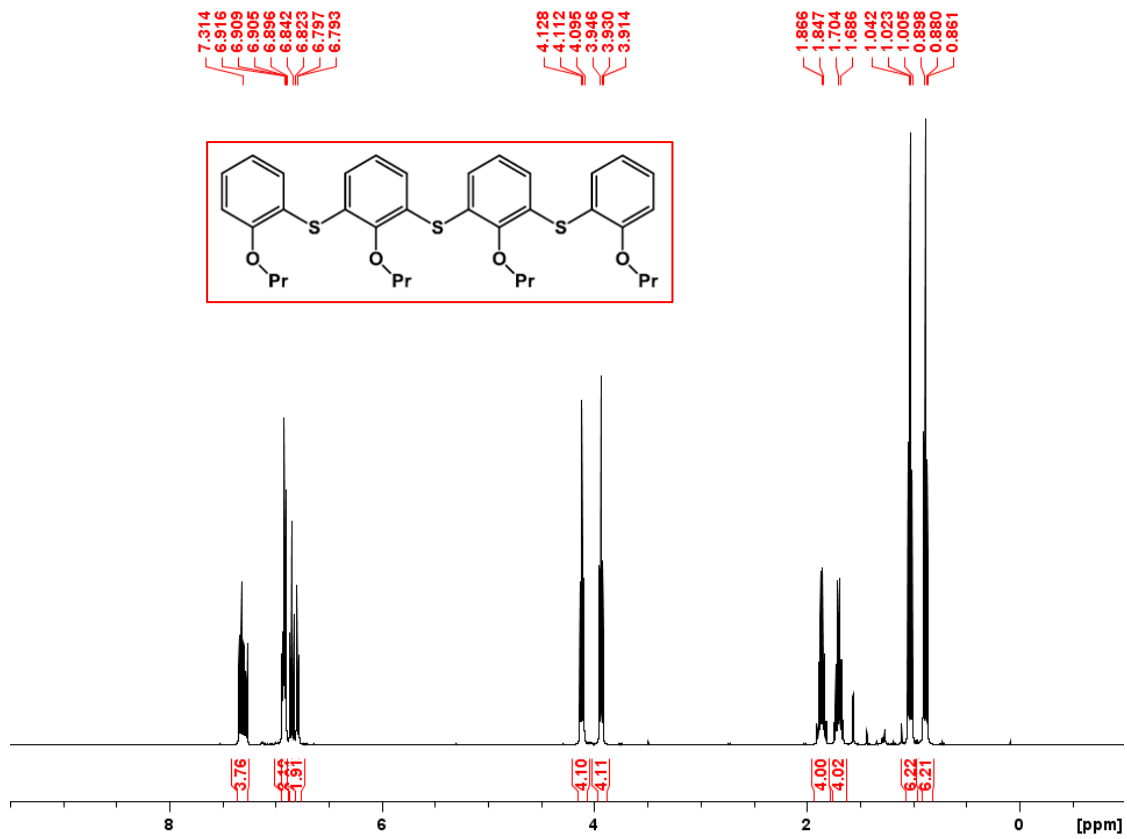

<sup>1</sup>H NMR spectrum of compound 4 (CDCl<sub>3</sub>, 298K, 400 MHz)

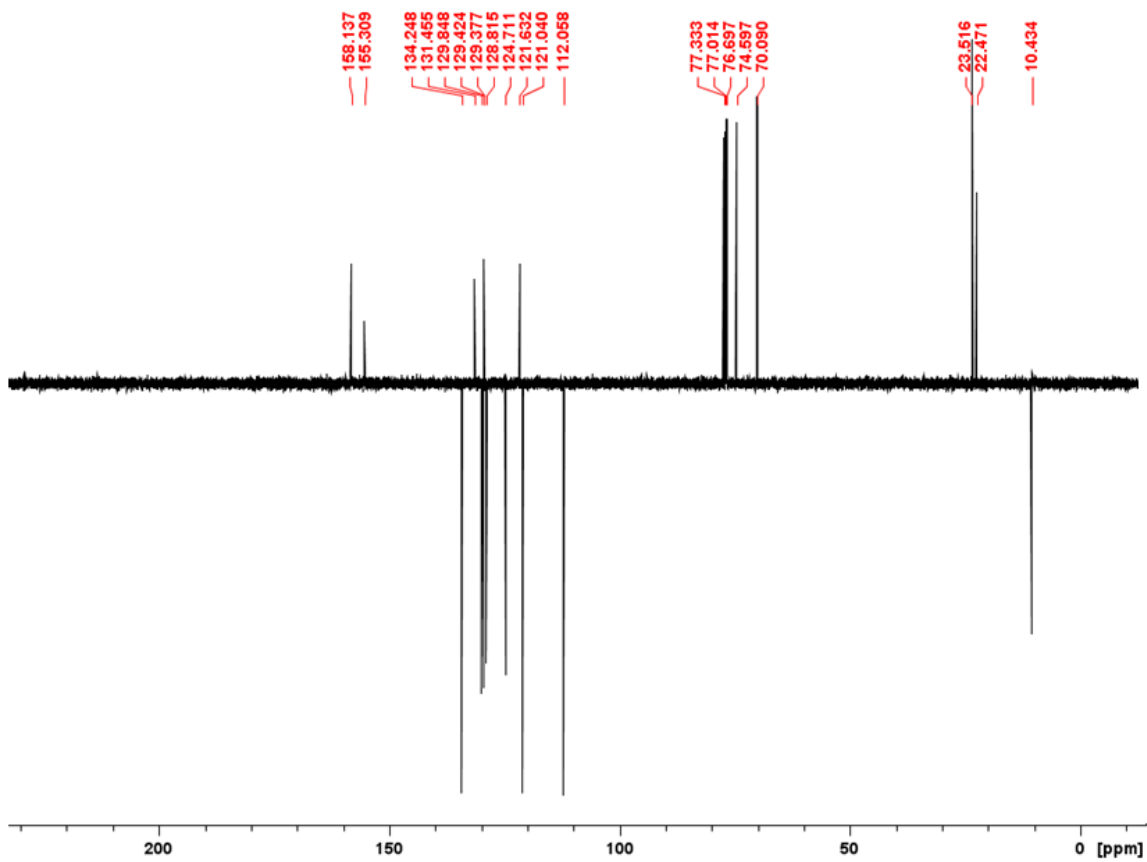

<sup>13</sup>C NMR (APT) spectrum of compound 4 (CDCl<sub>3</sub>, 298K, 100 MHz)

# Compound 4

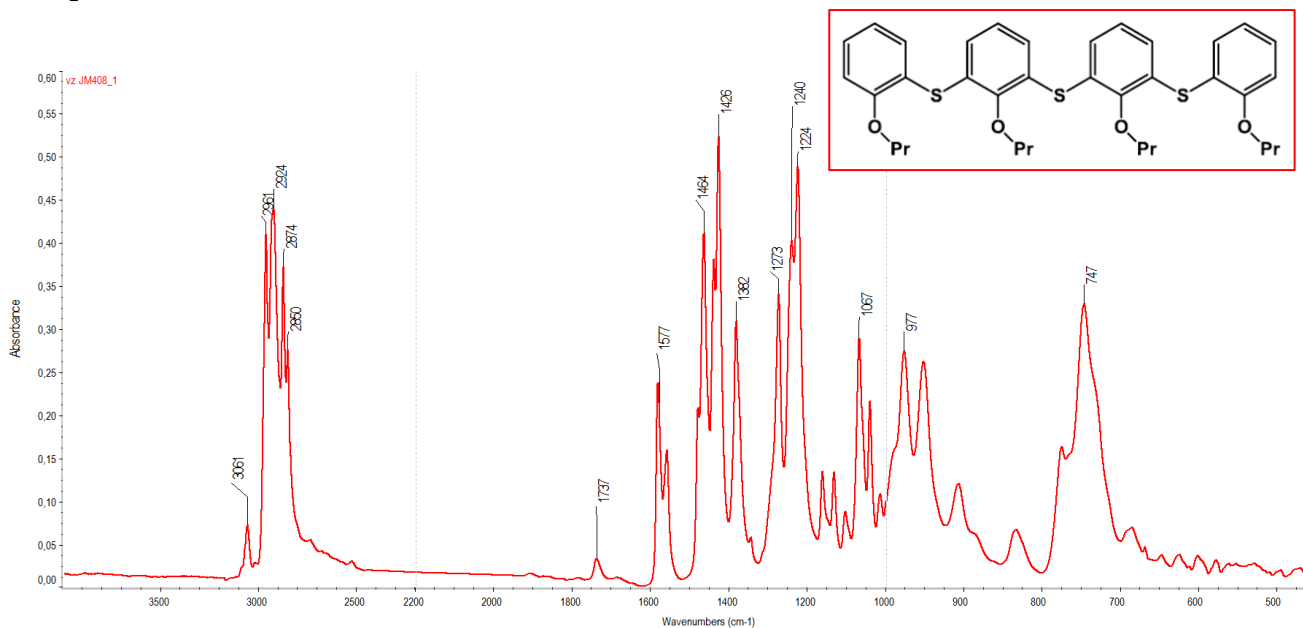

## IR (ATR) spectrum of compound 4

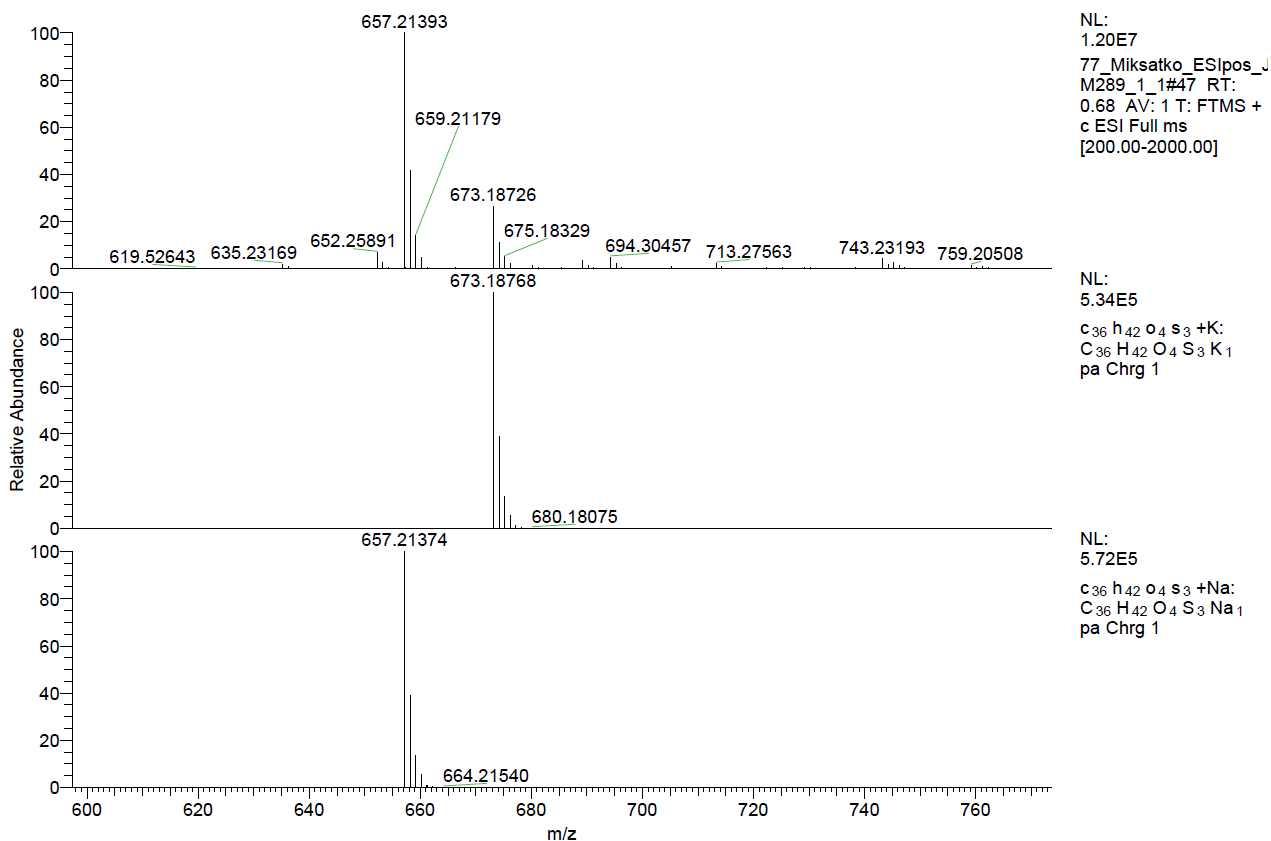

## HRMS (ESI<sup>+</sup>) spectrum of compound 4

# Compound 6

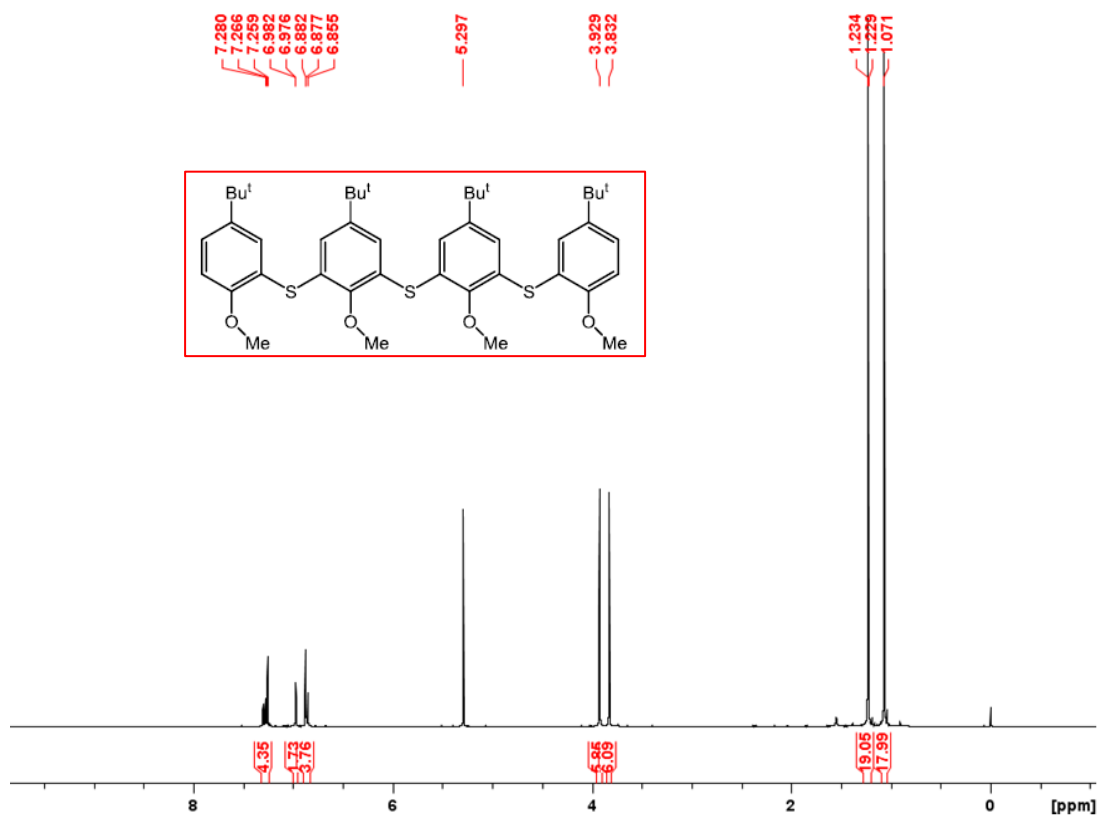

<sup>1</sup>H NMR spectrum of compound 6 (CDCl<sub>3</sub>, 298K, 400 MHz)

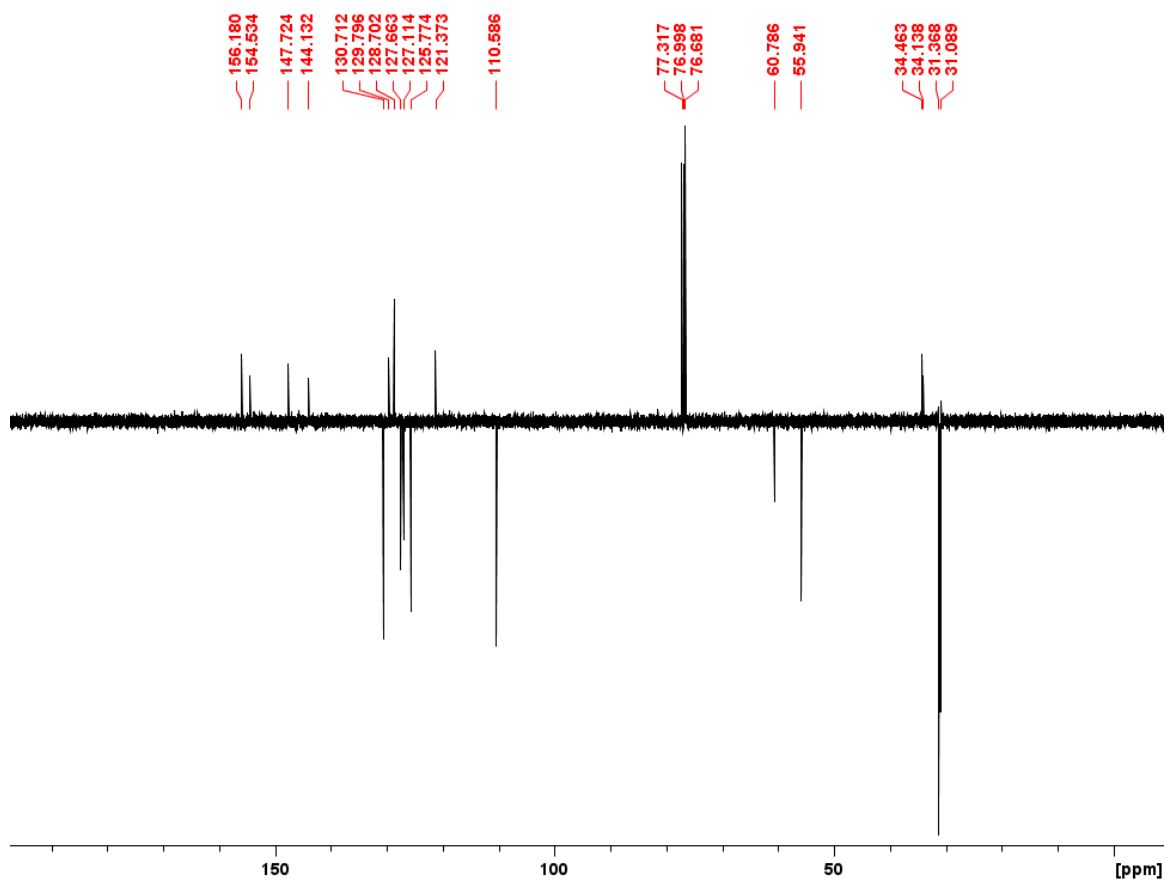

<sup>13</sup>C NMR (APT) spectrum of compound 6 (CDCl<sub>3</sub>, 298K, 100 MHz)

# Compound 6

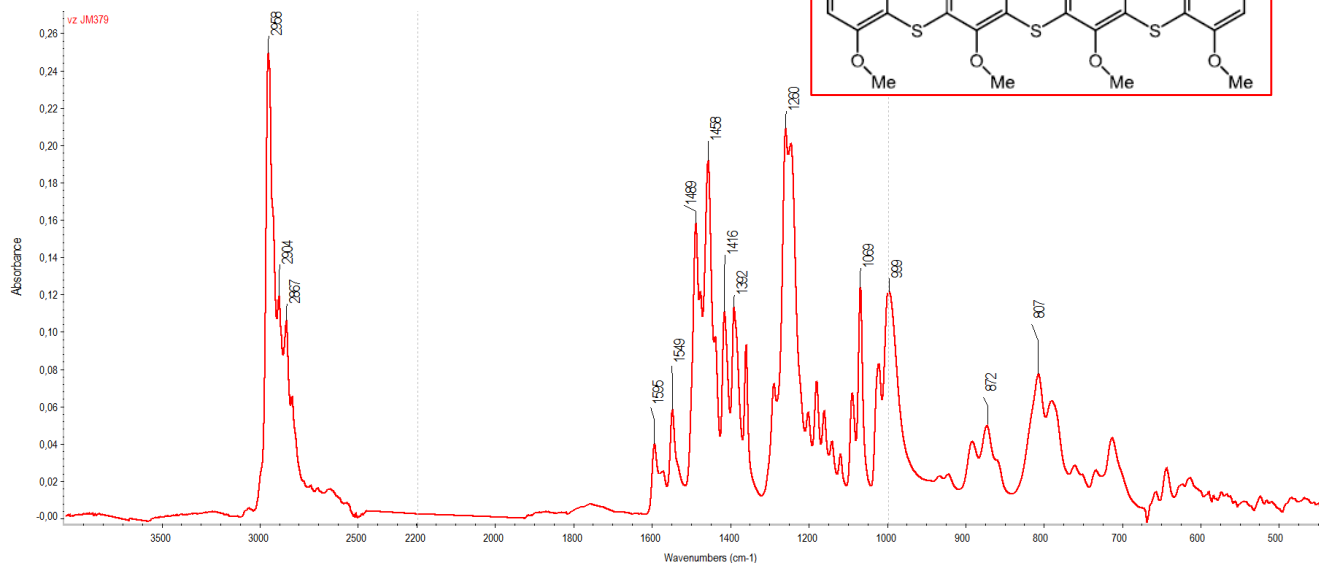

## IR (ATR) spectrum of compound 6

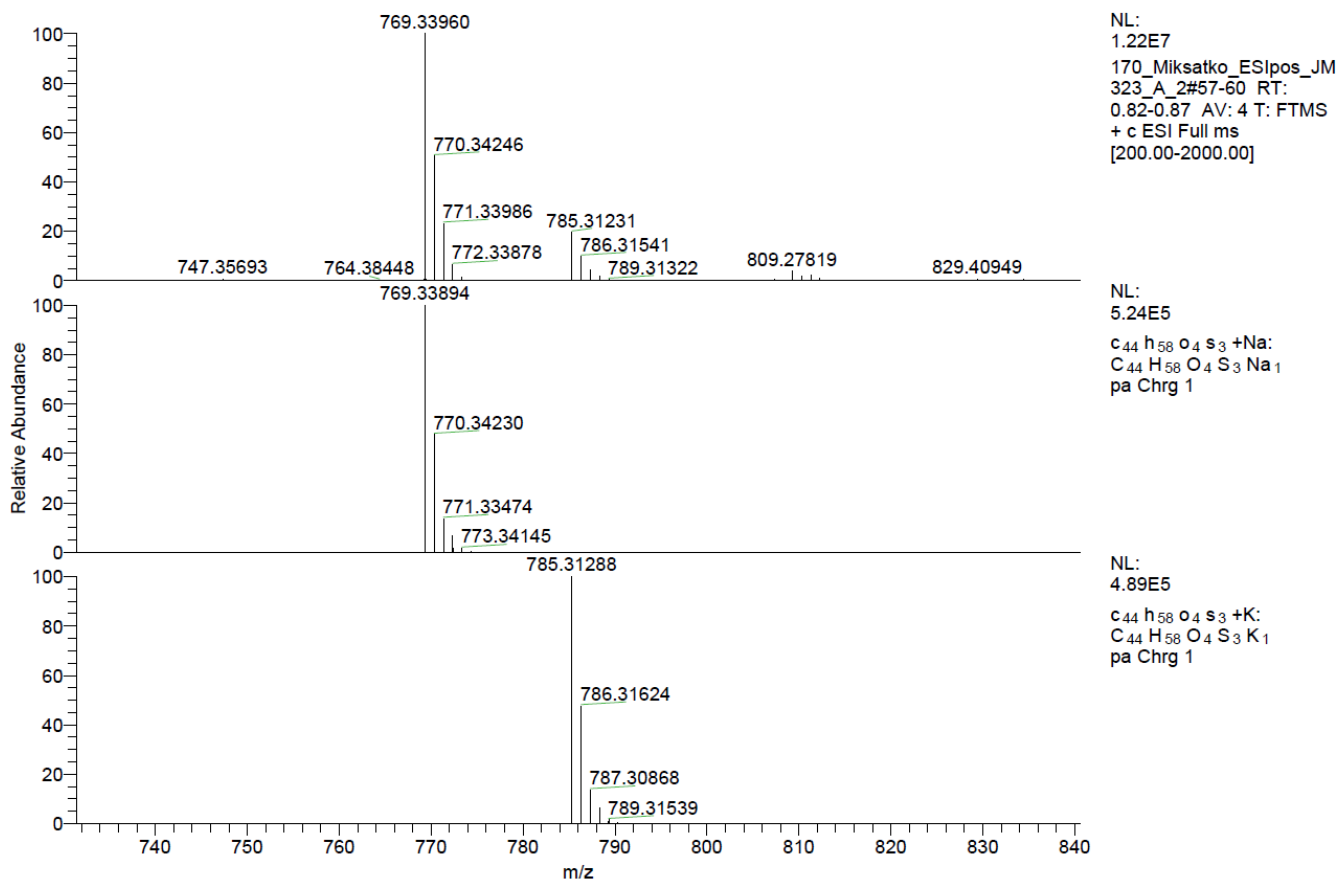

## HRMS (ESI<sup>+</sup>) spectrum of compound 6

Compound 7a

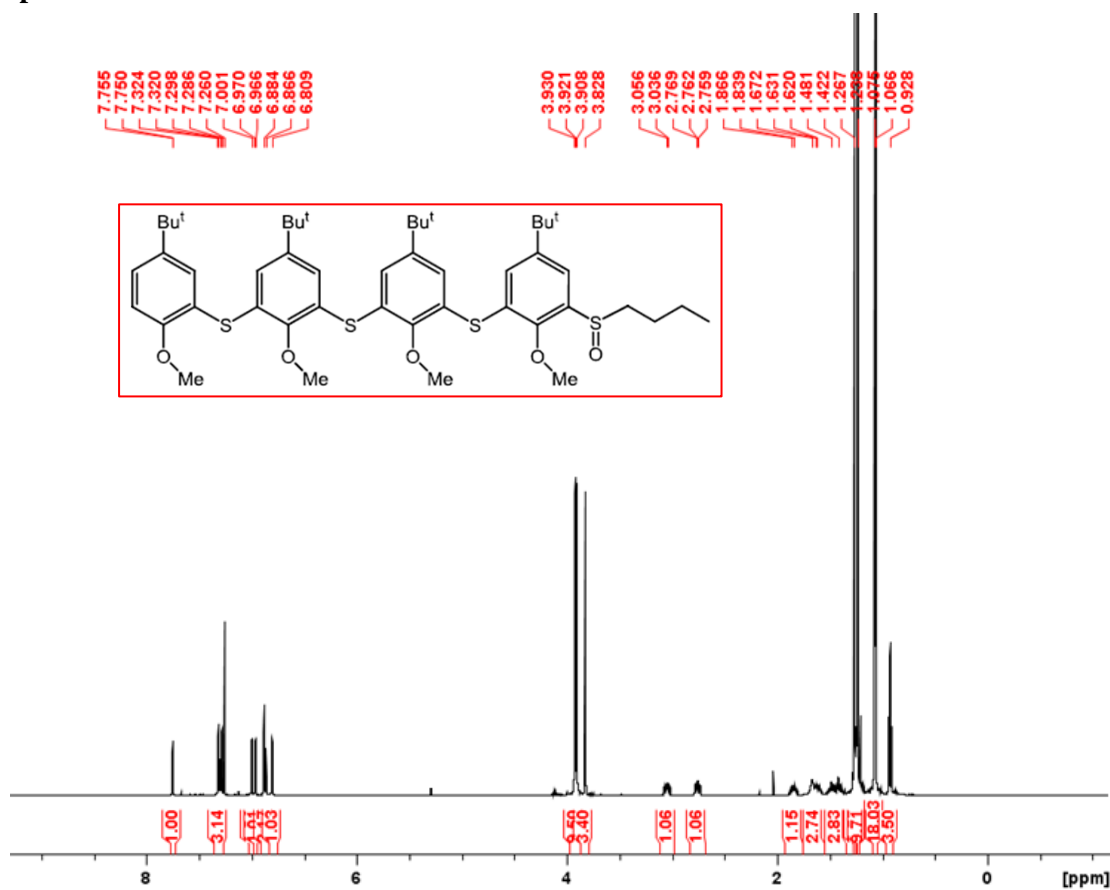

<sup>1</sup>H NMR spectrum of compound 7a (CDCl<sub>3</sub>, 298K, 400 MHz)

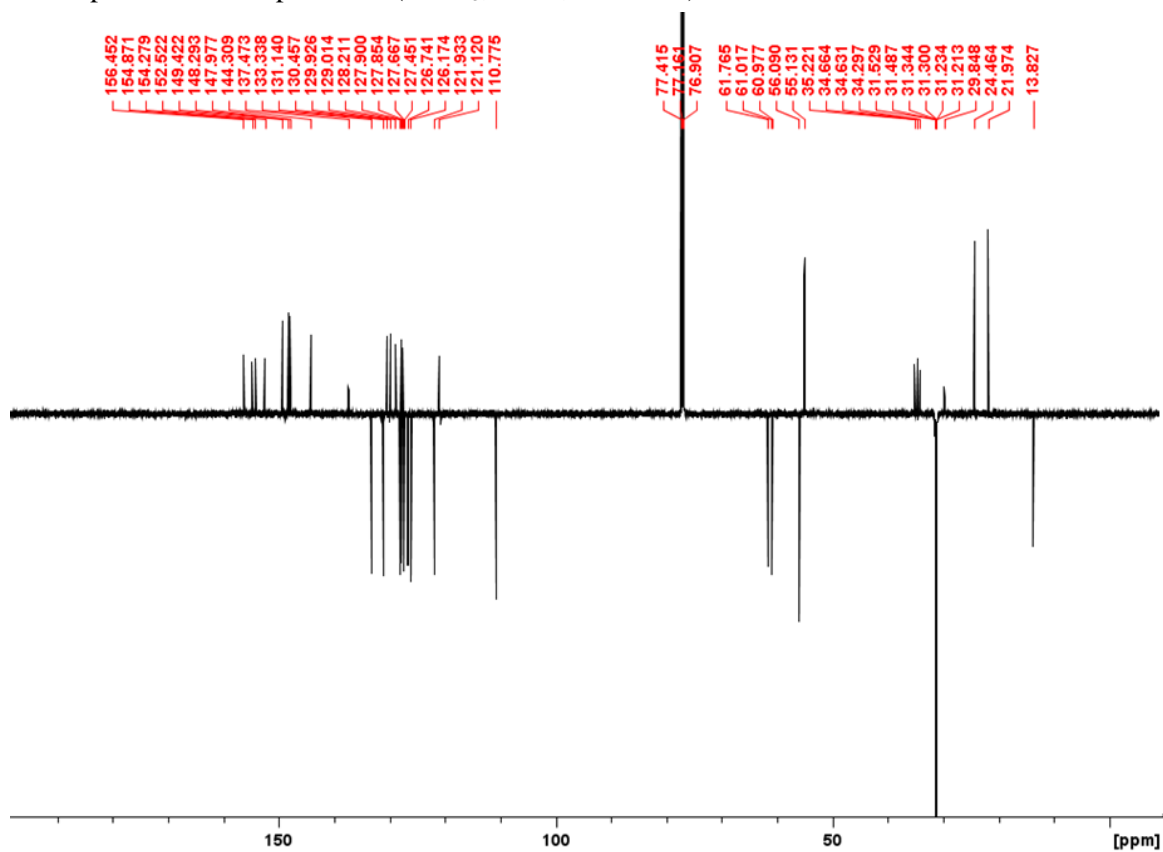

<sup>13</sup>C NMR (APT) spectrum of compound 7a (CDCl<sub>3</sub>, 298K, 100 MHz)

# Compound 7a

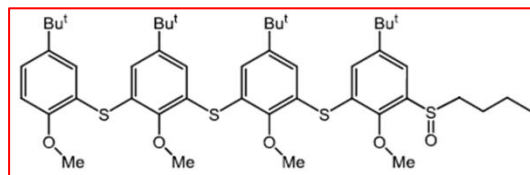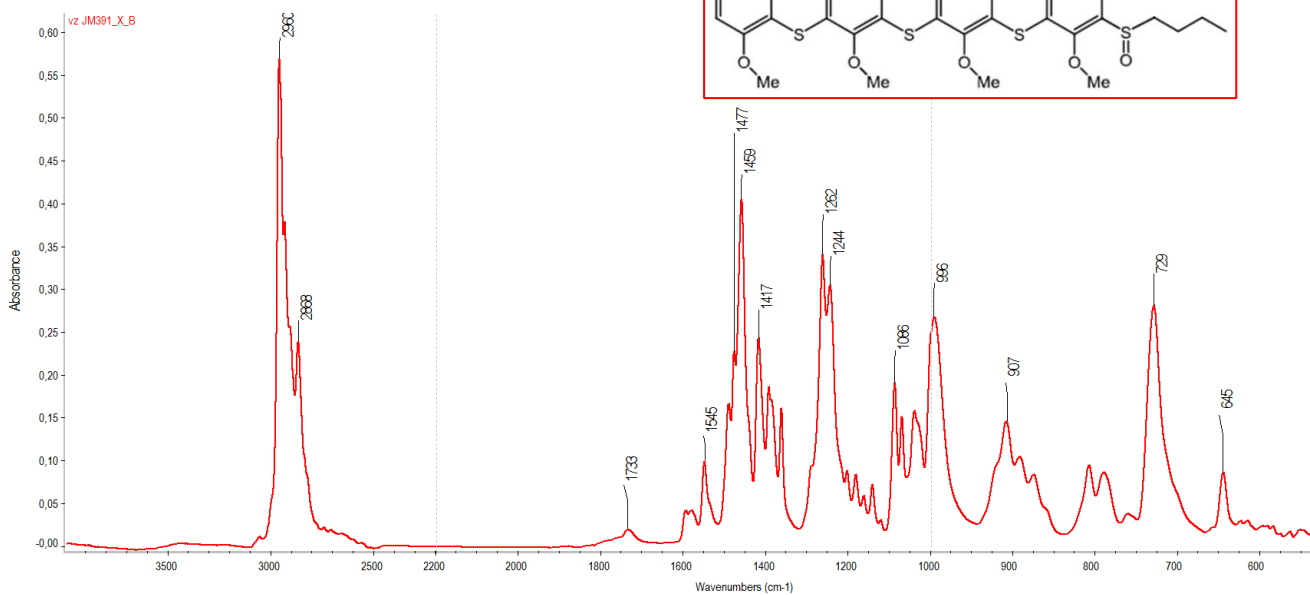

## IR (ATR) spectrum of compound 7a

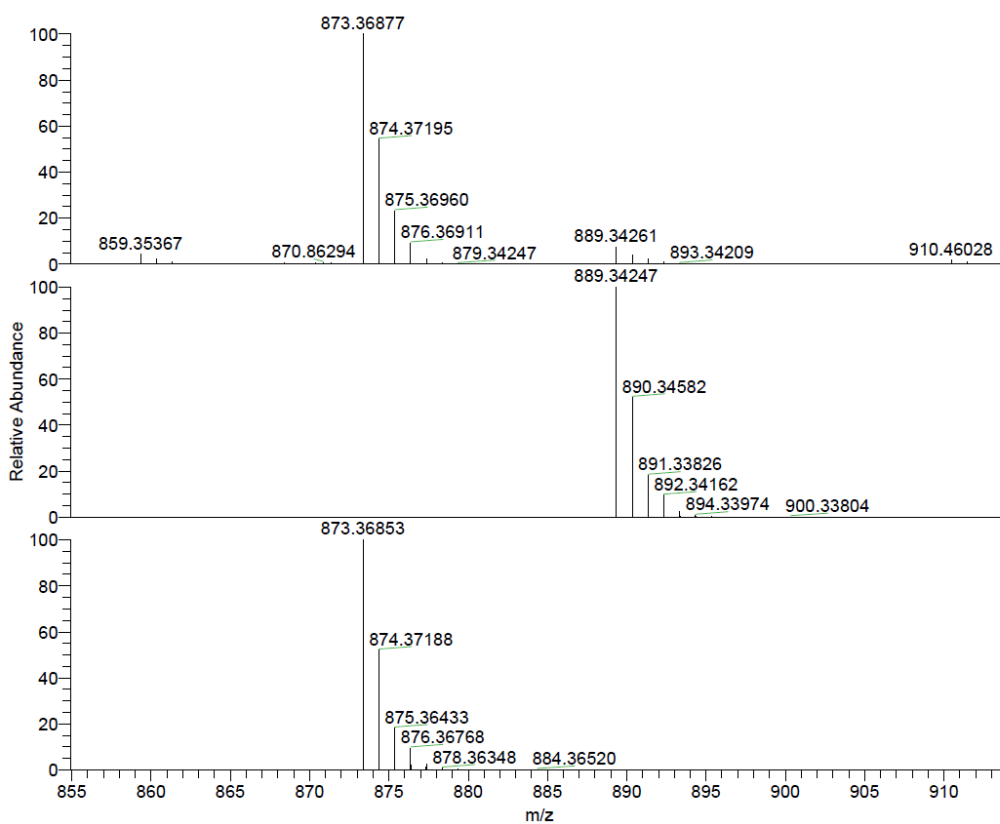

NL:  
5.20E6  
8\_Miksatko\_ESIpos\_JM3  
91\_X\_1#86-98 RT:  
1.29-1.48 AV: 13 T:  
FTMS + c ESI Full ms  
[100.00-1500.00]

NL:  
4.43E5  
C<sub>48</sub>H<sub>66</sub>O<sub>5</sub>S<sub>4</sub>+K:  
C<sub>48</sub>H<sub>66</sub>O<sub>5</sub>S<sub>4</sub>K<sub>1</sub>  
pa Chrg 1

NL:  
4.75E5  
C<sub>48</sub>H<sub>66</sub>O<sub>5</sub>S<sub>4</sub>+Na:  
C<sub>48</sub>H<sub>66</sub>O<sub>5</sub>S<sub>4</sub>Na<sub>1</sub>  
pa Chrg 1

## HRMS (ESI<sup>+</sup>) spectrum of compound 7a

Compound 7b

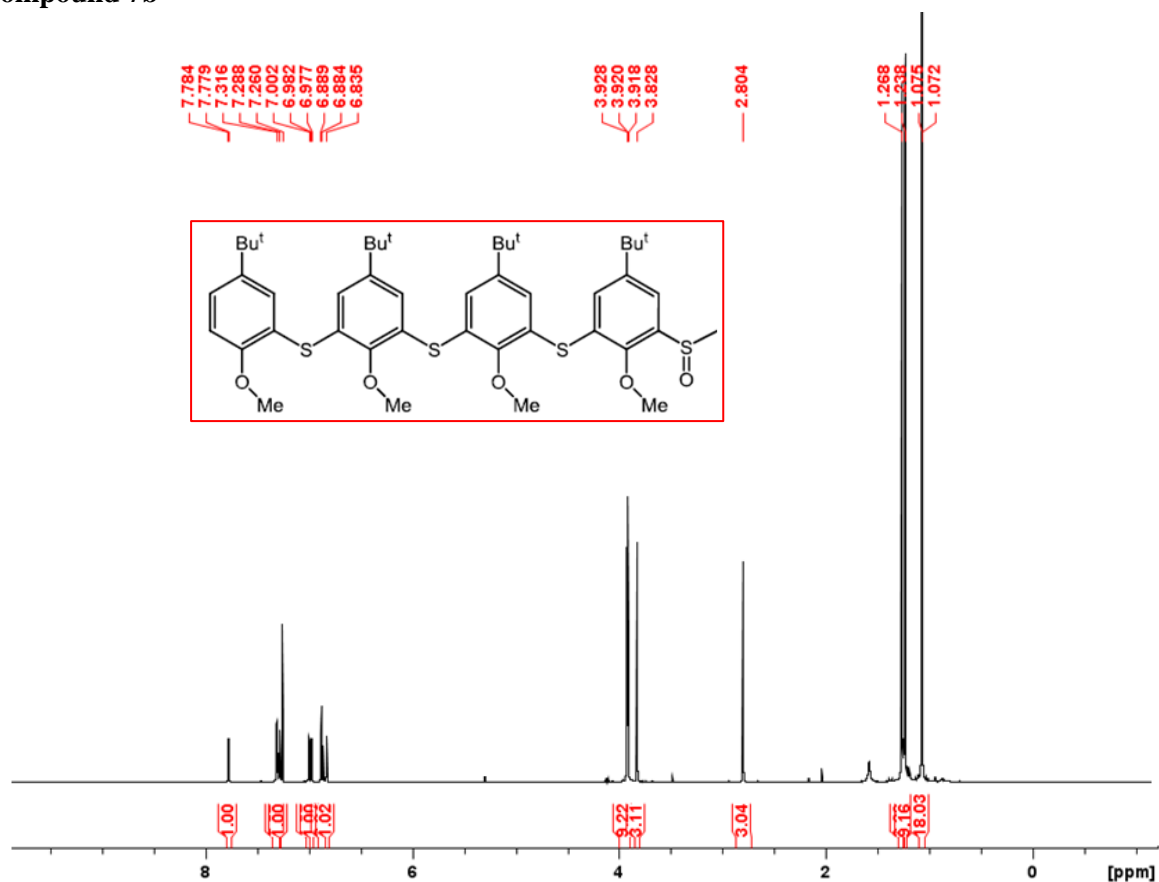

<sup>1</sup>H NMR spectrum of compound 7b (CDCl<sub>3</sub>, 298K, 400 MHz)

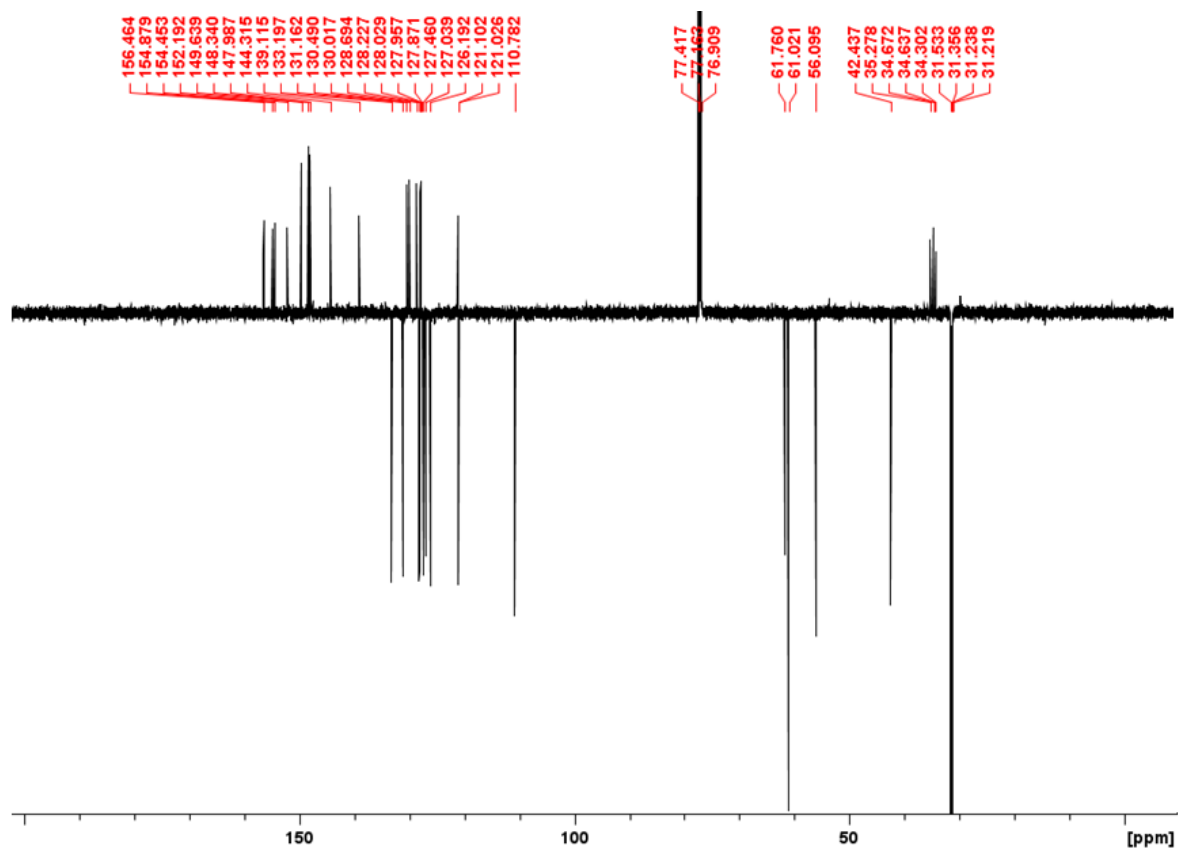

<sup>13</sup>C NMR (APT) spectrum of compound 7b (CDCl<sub>3</sub>, 298K, 100 MHz)



# Compound 7b

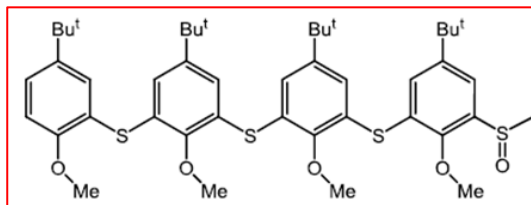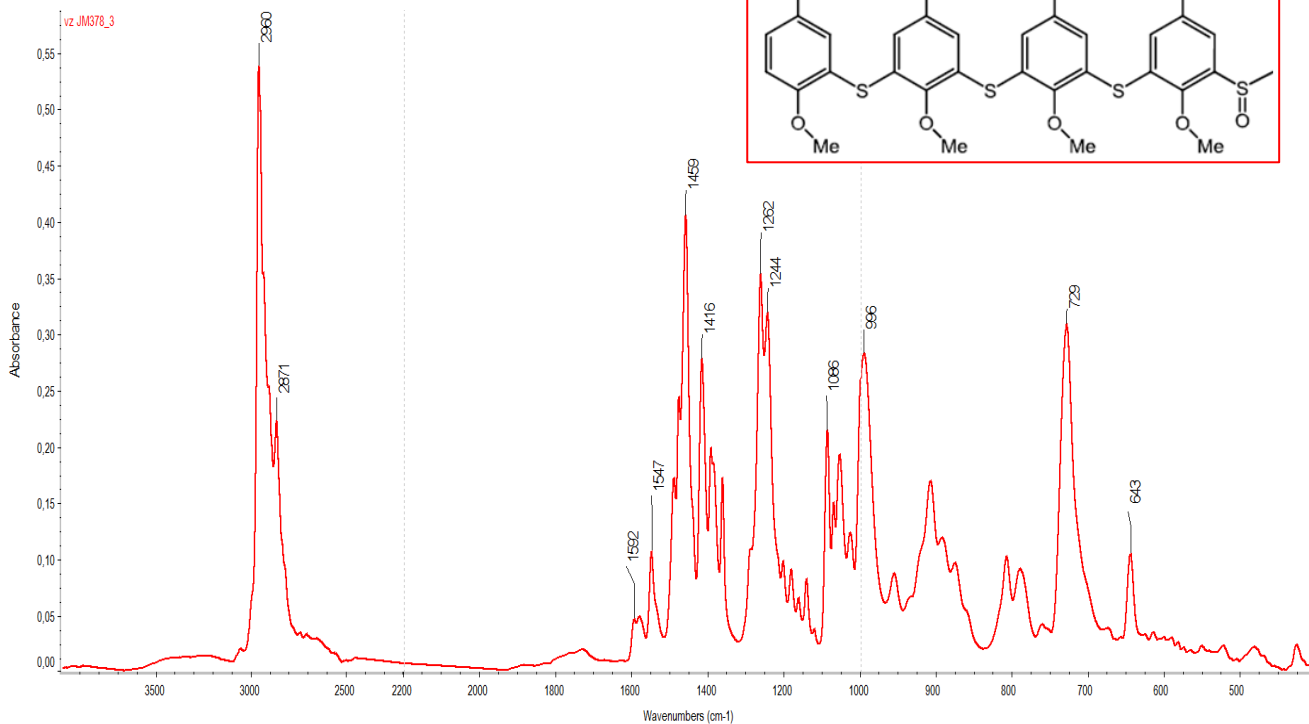

## IR (ATR) spectrum of compound 7b

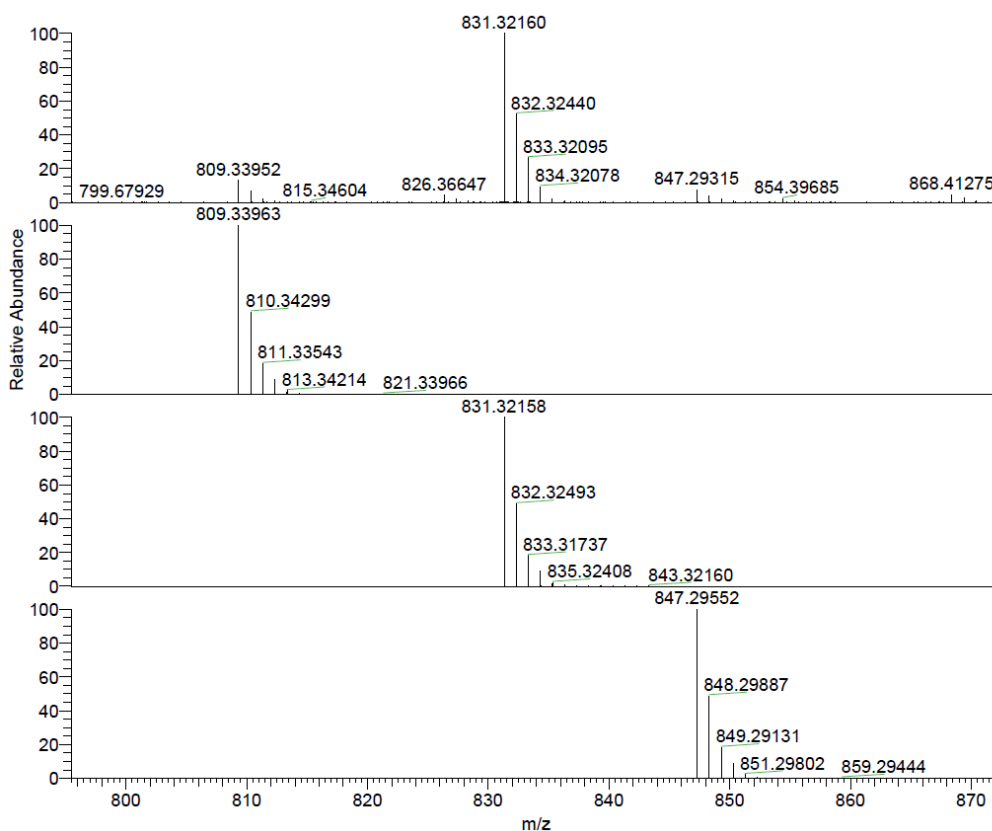

NL:  
1.55E7  
27\_Miksatko\_ESIpos\_JM37  
8\_3\_1#25-27 RT:  
0.53-0.57 AV: 3 T: FTMS +  
c ESI Full ms  
[200.00-2000.00]

NL:  
4.91E5  
C<sub>45</sub>H<sub>60</sub>O<sub>5</sub>S<sub>4</sub>+H:  
C<sub>45</sub>H<sub>61</sub>O<sub>5</sub>S<sub>4</sub>  
pa Chrg 1

NL:  
4.91E5  
C<sub>45</sub>H<sub>60</sub>O<sub>5</sub>S<sub>4</sub>+Na:  
C<sub>45</sub>H<sub>60</sub>O<sub>5</sub>S<sub>4</sub>Na<sub>1</sub>  
pa Chrg 1

NL:  
4.58E5  
C<sub>45</sub>H<sub>60</sub>O<sub>5</sub>S<sub>4</sub>+K:  
C<sub>45</sub>H<sub>60</sub>O<sub>5</sub>S<sub>4</sub>K<sub>1</sub>  
pa Chrg 1

## HRMS (ESI<sup>+</sup>) spectrum of compound 7b

# Compound 8

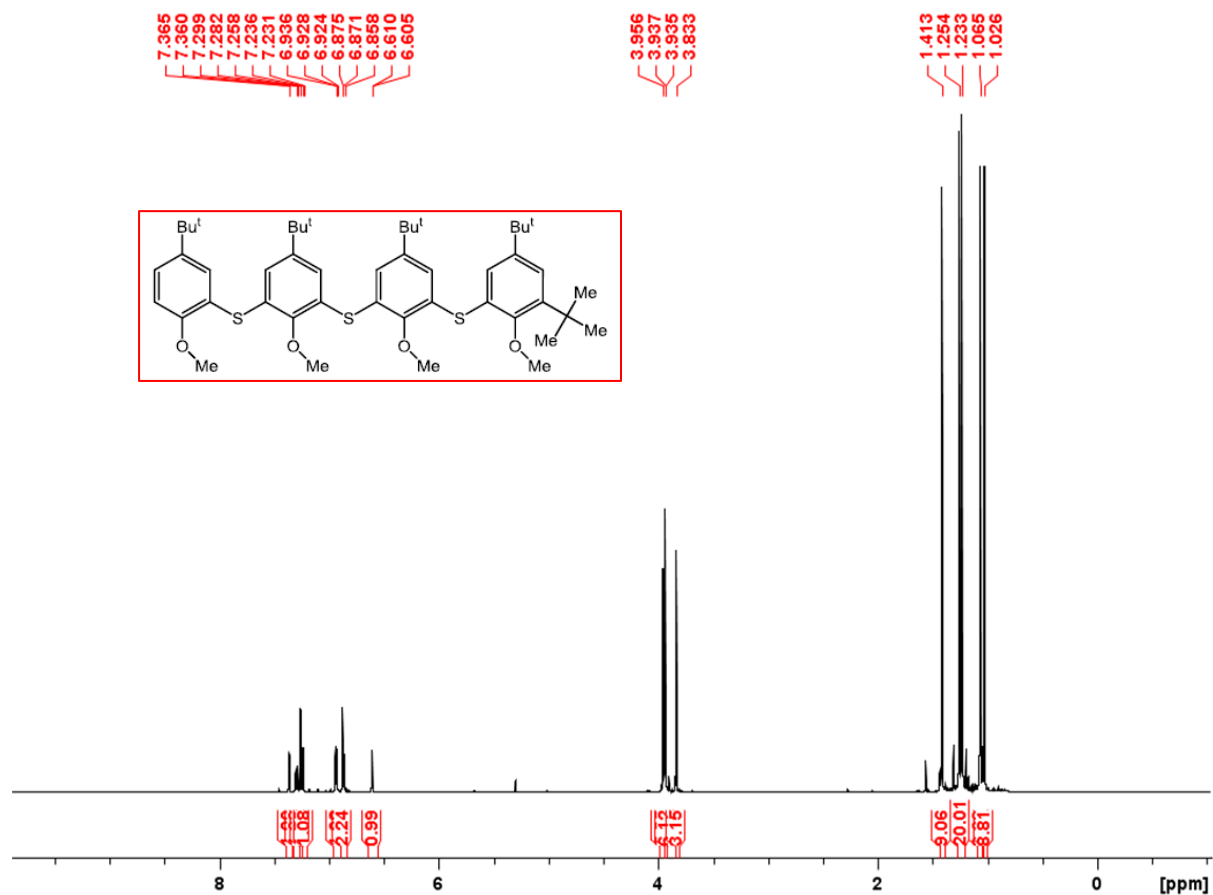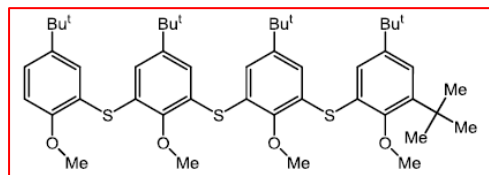

<sup>1</sup>H NMR spectrum of compound 8 (CDCl<sub>3</sub>, 298K, 400 MHz)

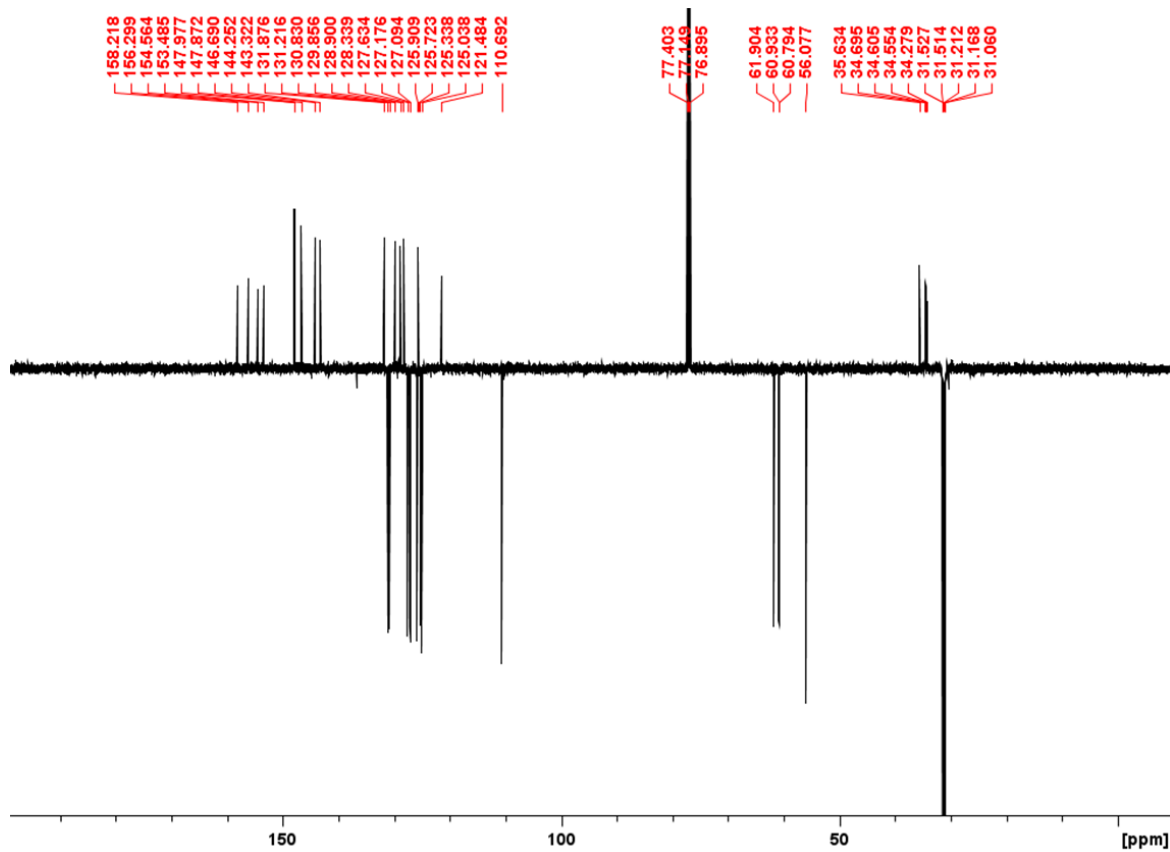

<sup>13</sup>C NMR (APT) spectrum of compound 8 (CDCl<sub>3</sub>, 298K, 100 MHz)

# Compound 8

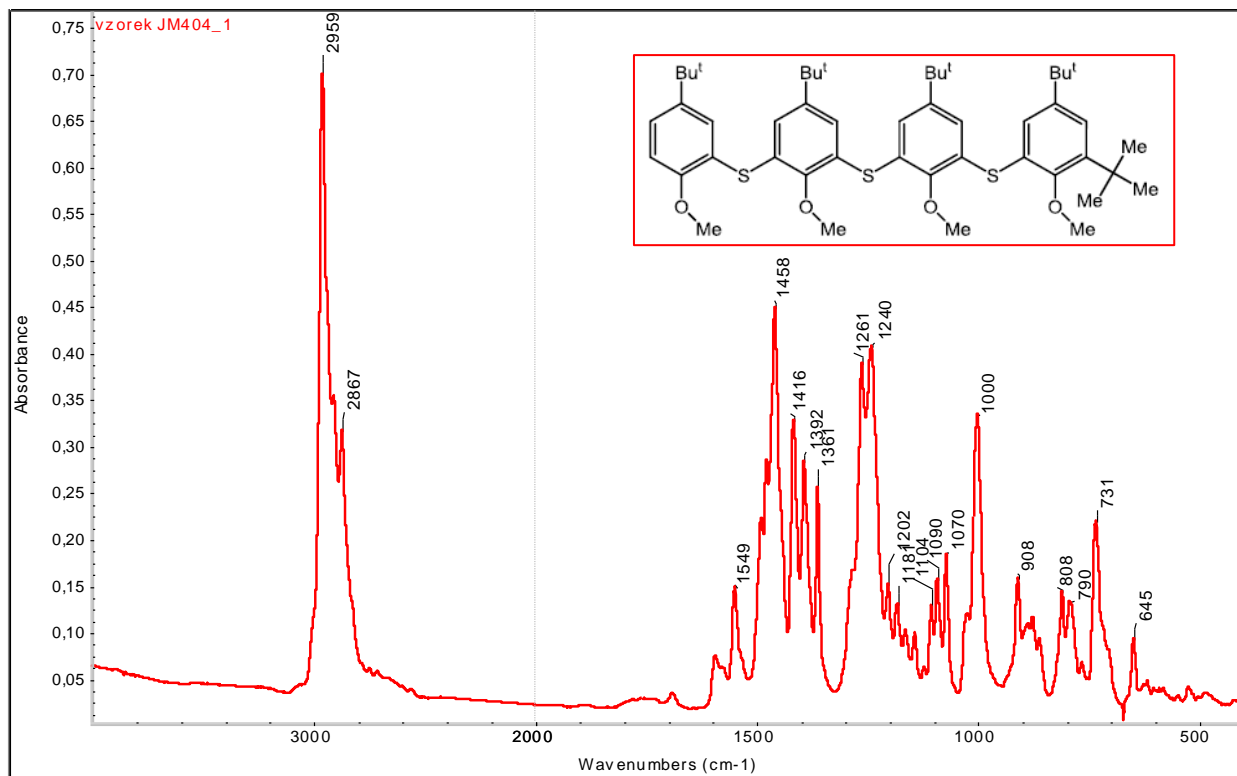

## IR (ATR) spectrum of compound 8

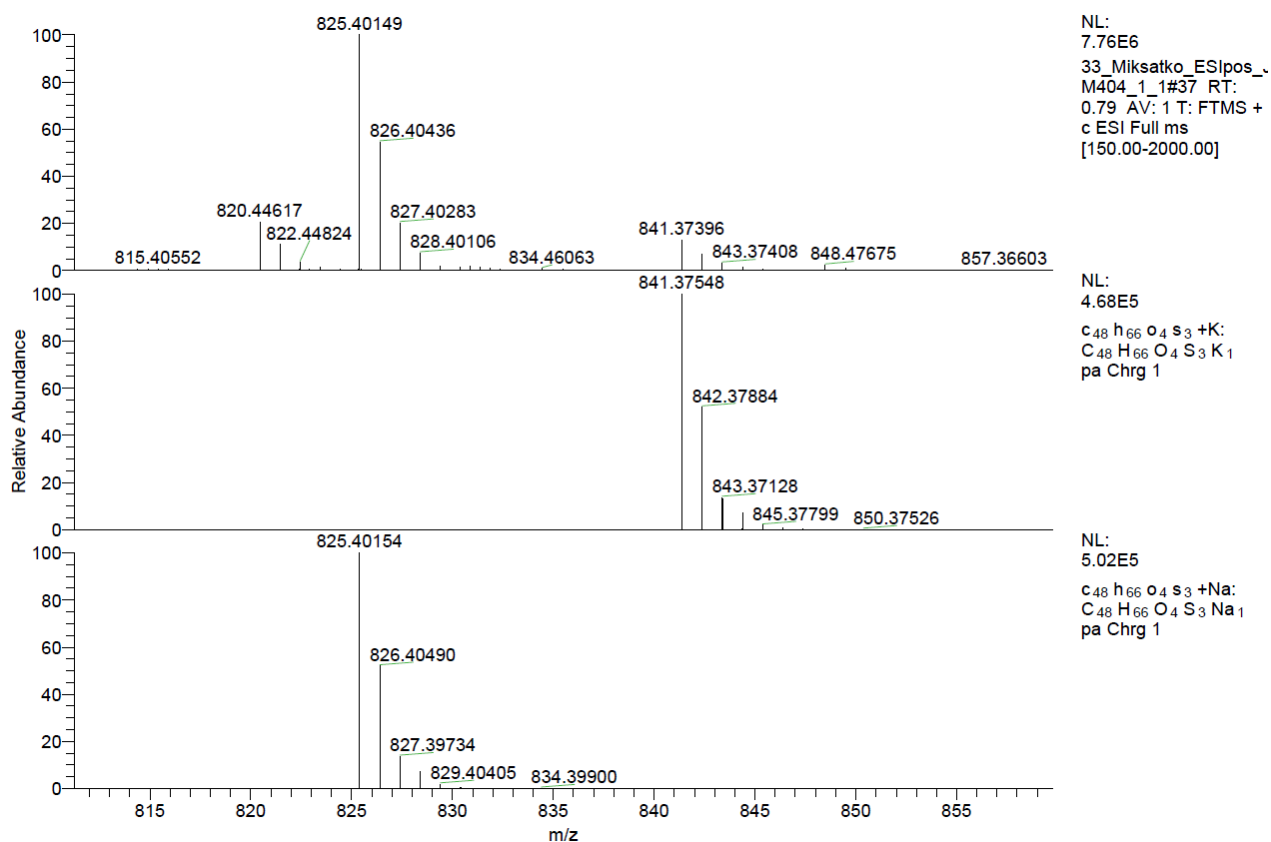

## HRMS (ESI<sup>+</sup>) spectrum of compound 8

**Compound 9**

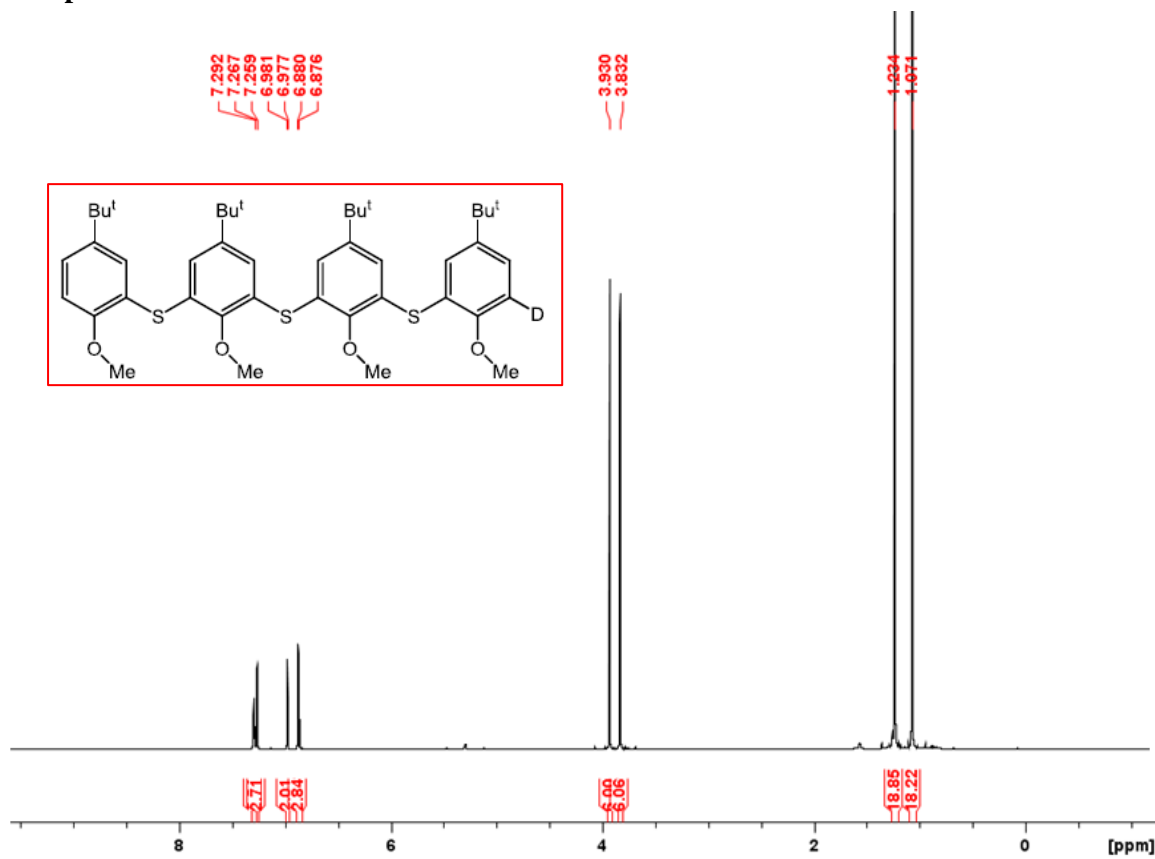

<sup>1</sup>H NMR spectrum of compound **9** (CDCl<sub>3</sub>, 298K, 400 MHz)

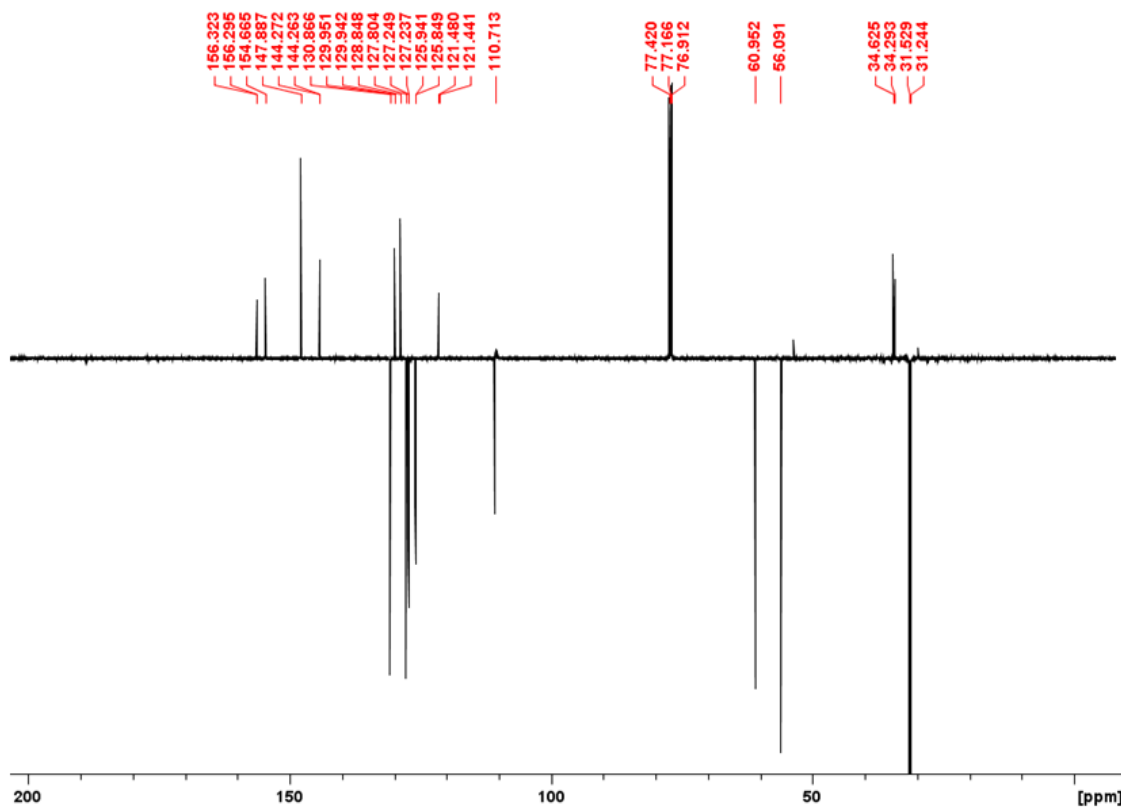

<sup>13</sup>C NMR (APT) spectrum of compound **9** (CDCl<sub>3</sub>, 298K, 100 MHz)

# Compound 9

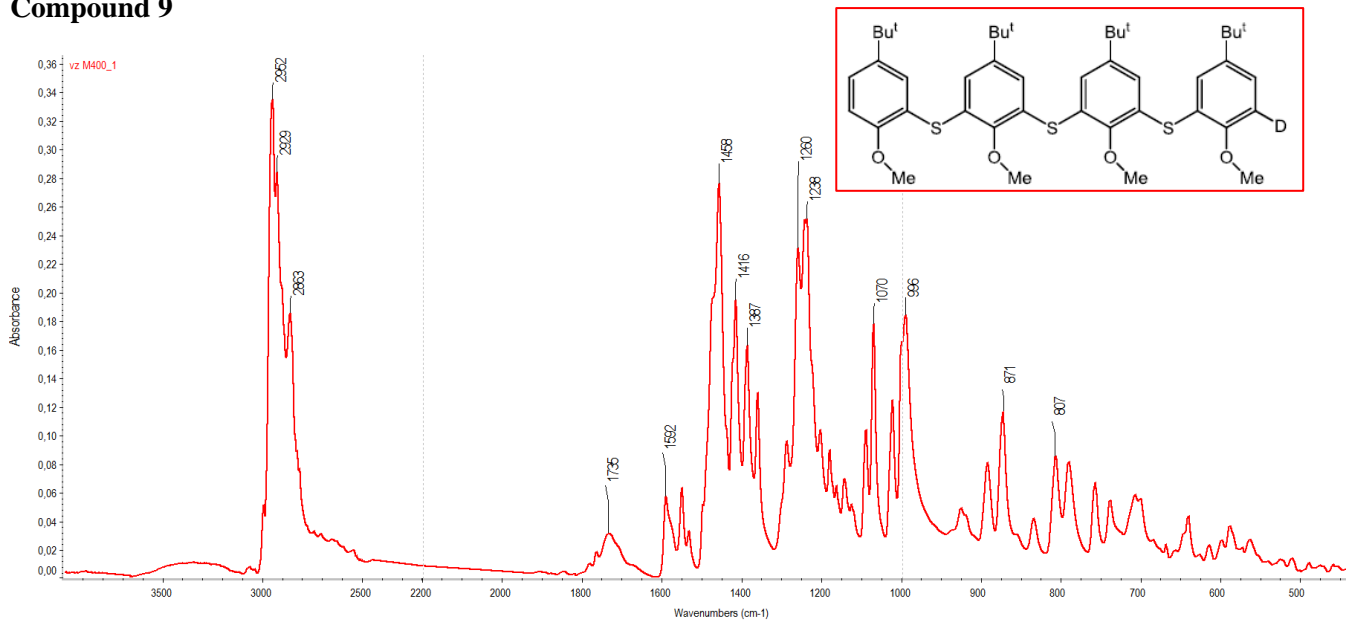

## IR (ATR) spectrum of compound 9

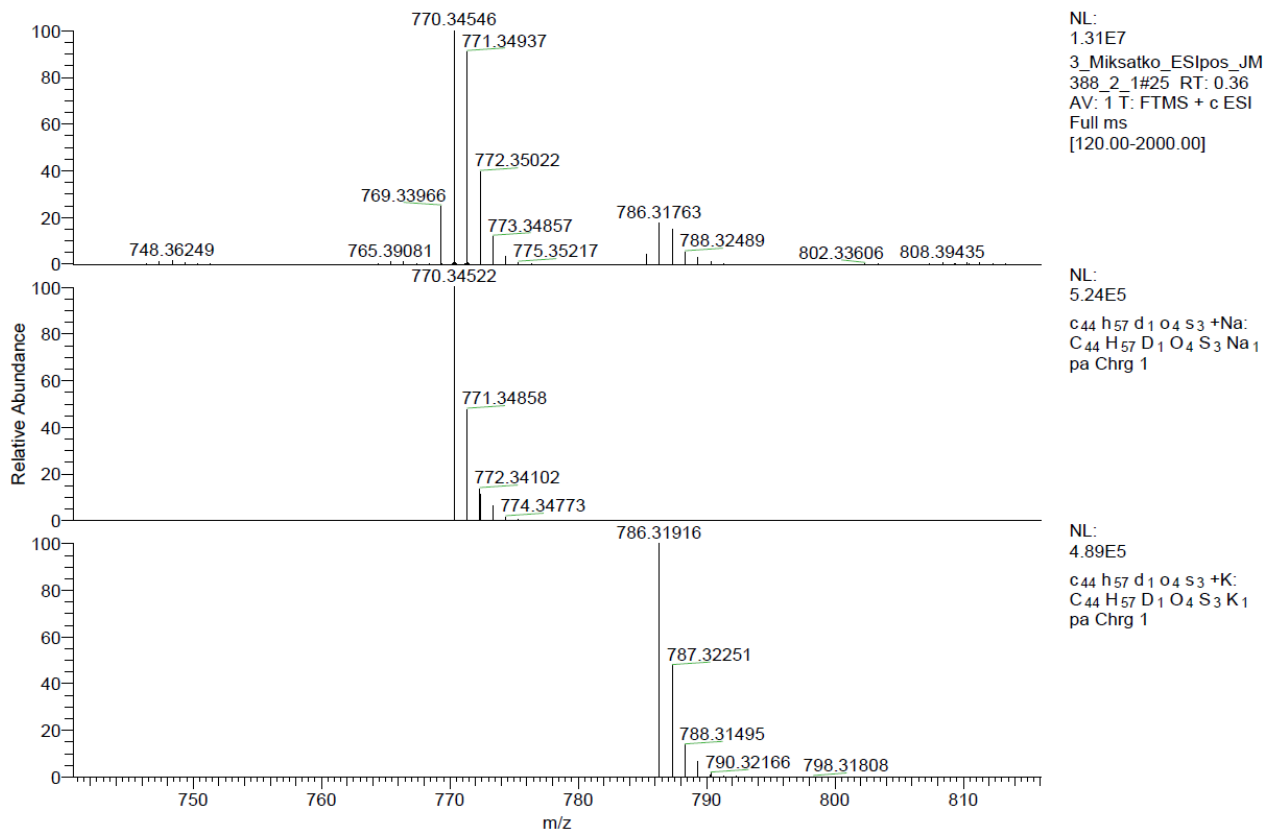

## HRMS (ESI<sup>+</sup>) spectrum of compound 9

# Compound 17

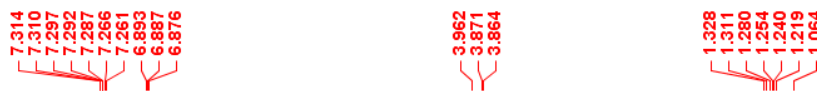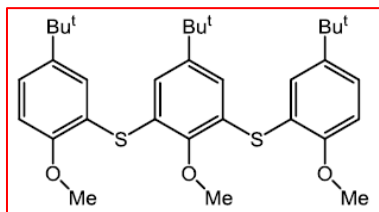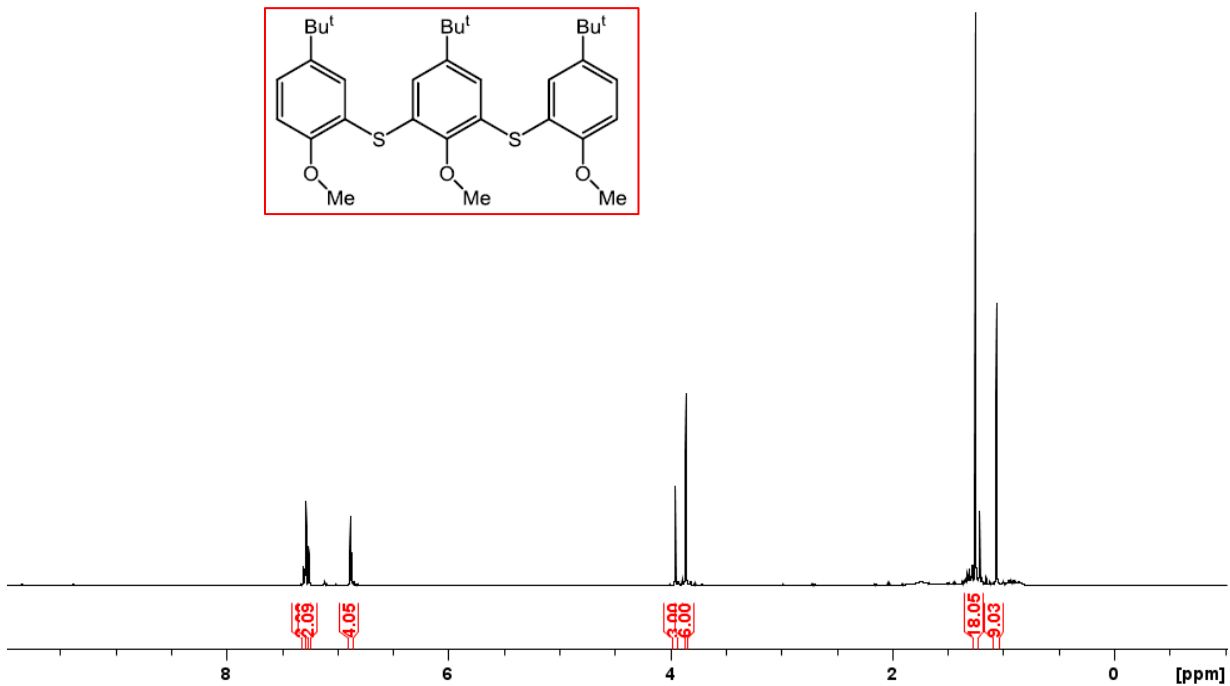

<sup>1</sup>H NMR spectrum of compound 17 (CDCl<sub>3</sub>, 298K, 400 MHz)

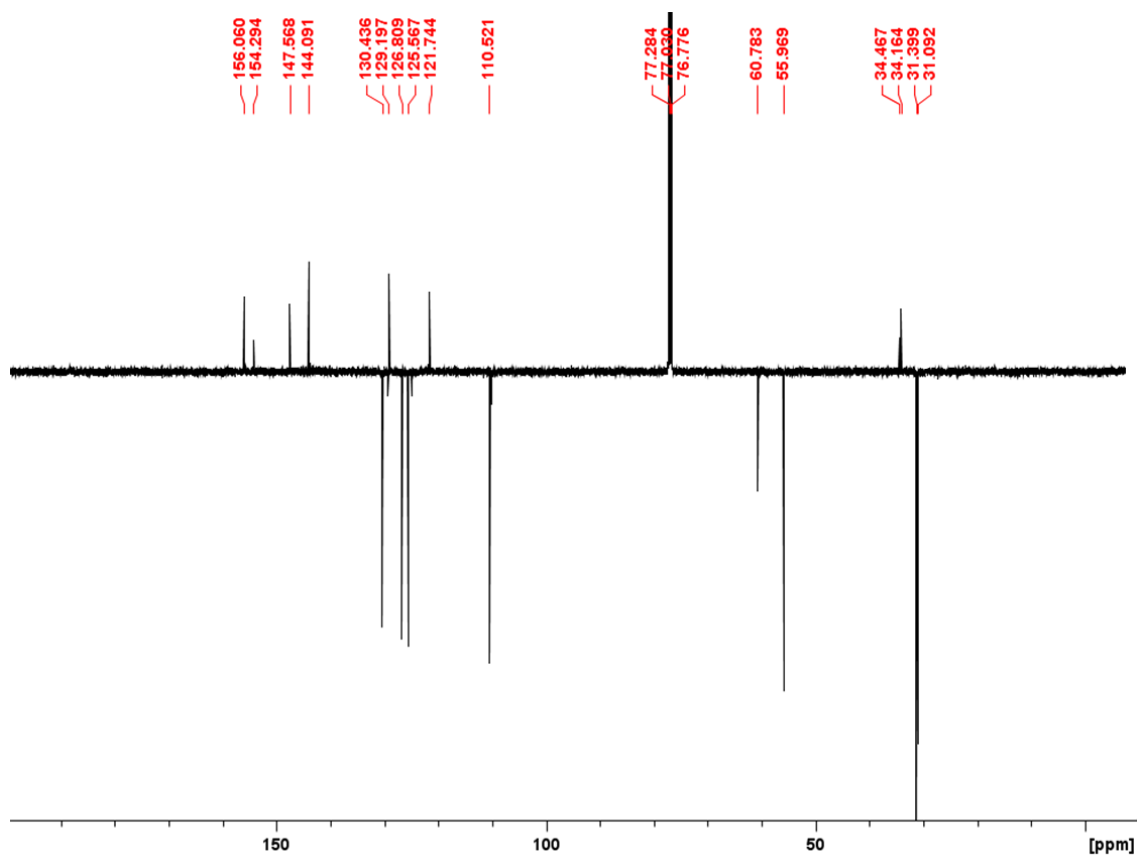

<sup>13</sup>C NMR (APT) spectrum of compound 17 (CDCl<sub>3</sub>, 298K, 100 MHz)

# Compound 17

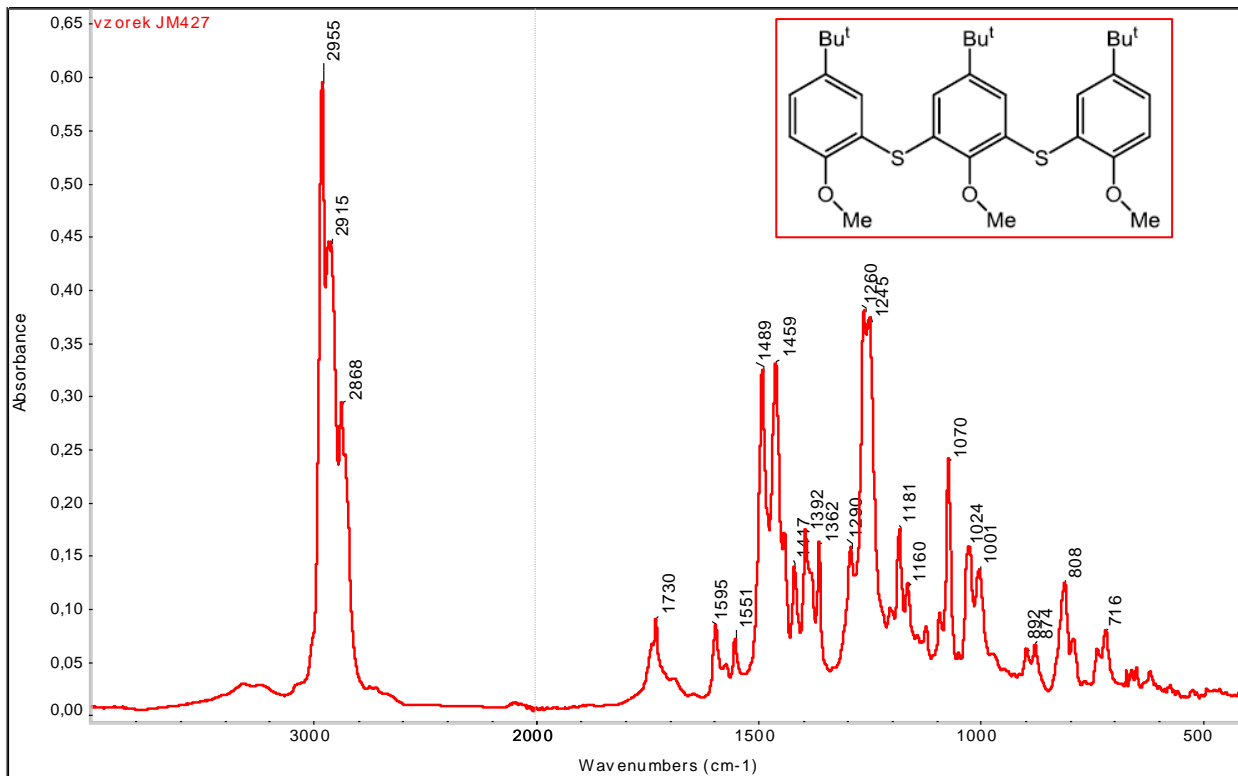

## IR (ATR) spectrum of compound 17

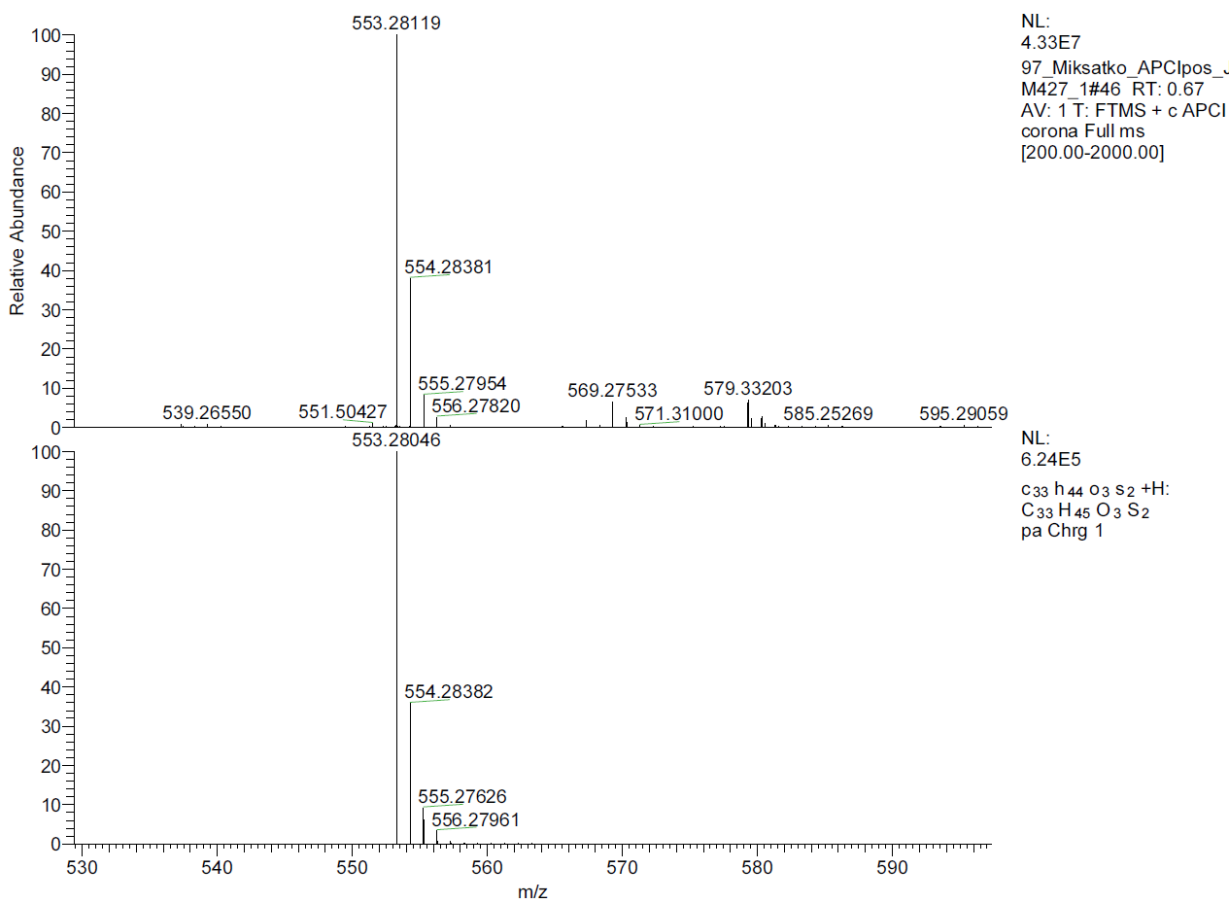

## HRMS (ESI<sup>+</sup>) spectrum of compound 17

# Compound 18

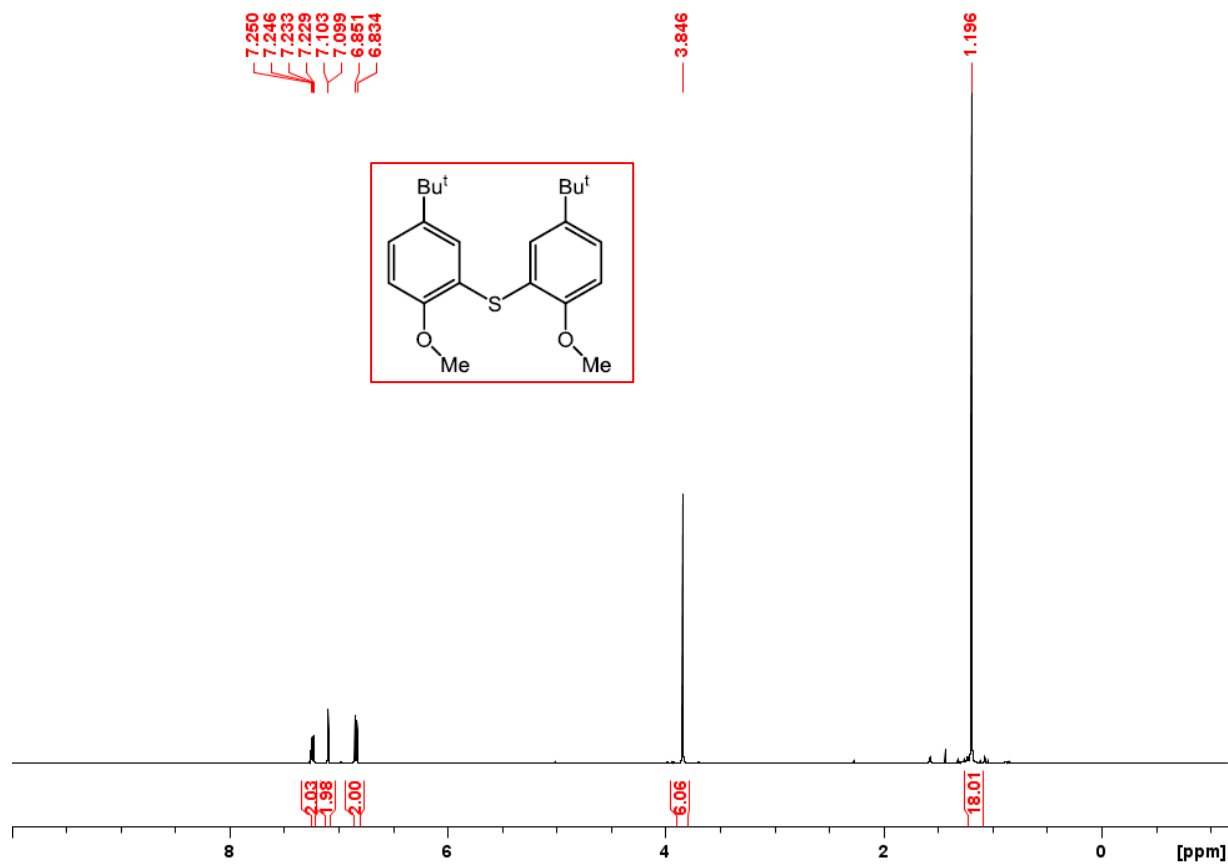

<sup>1</sup>H NMR spectrum of compound **18** (CDCl<sub>3</sub>, 298K, 400 MHz)

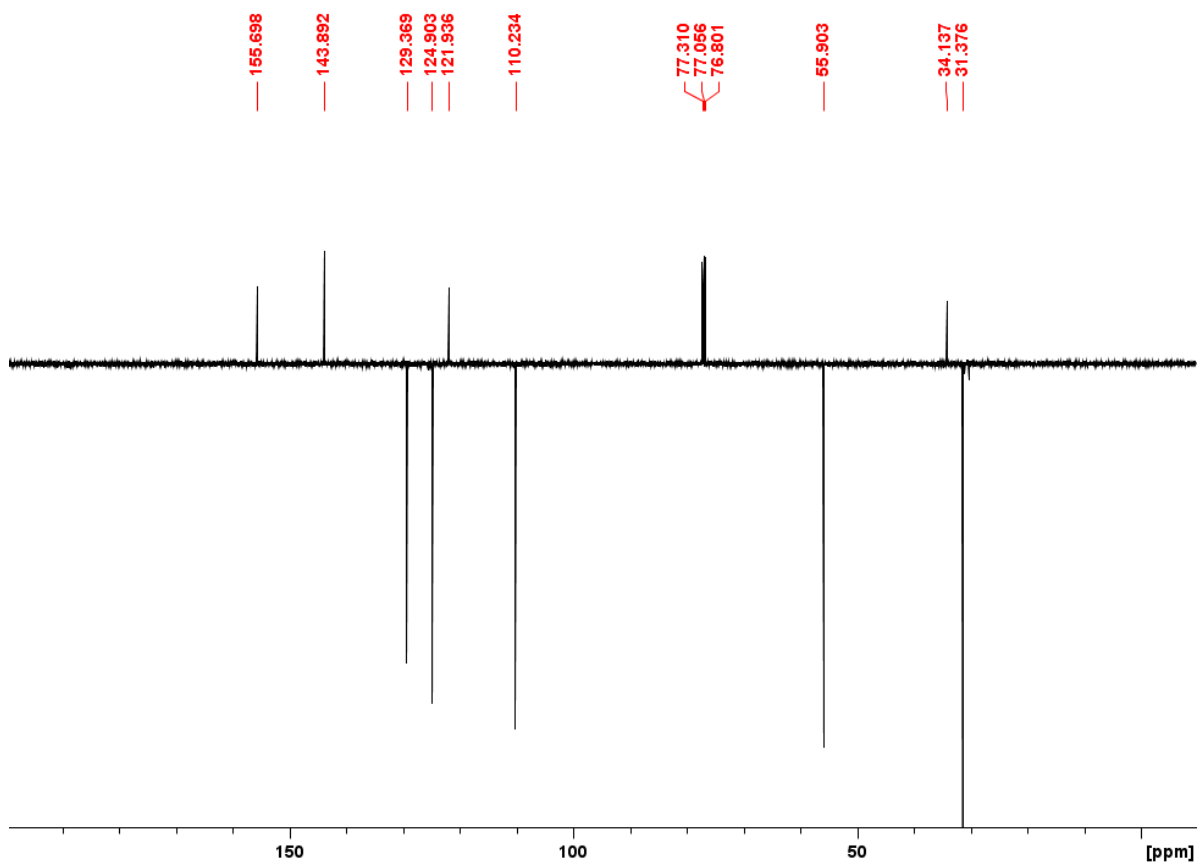

<sup>13</sup>C NMR (APT) spectrum of compound **18** (CDCl<sub>3</sub>, 298K, 100 MHz)



# Compound 18

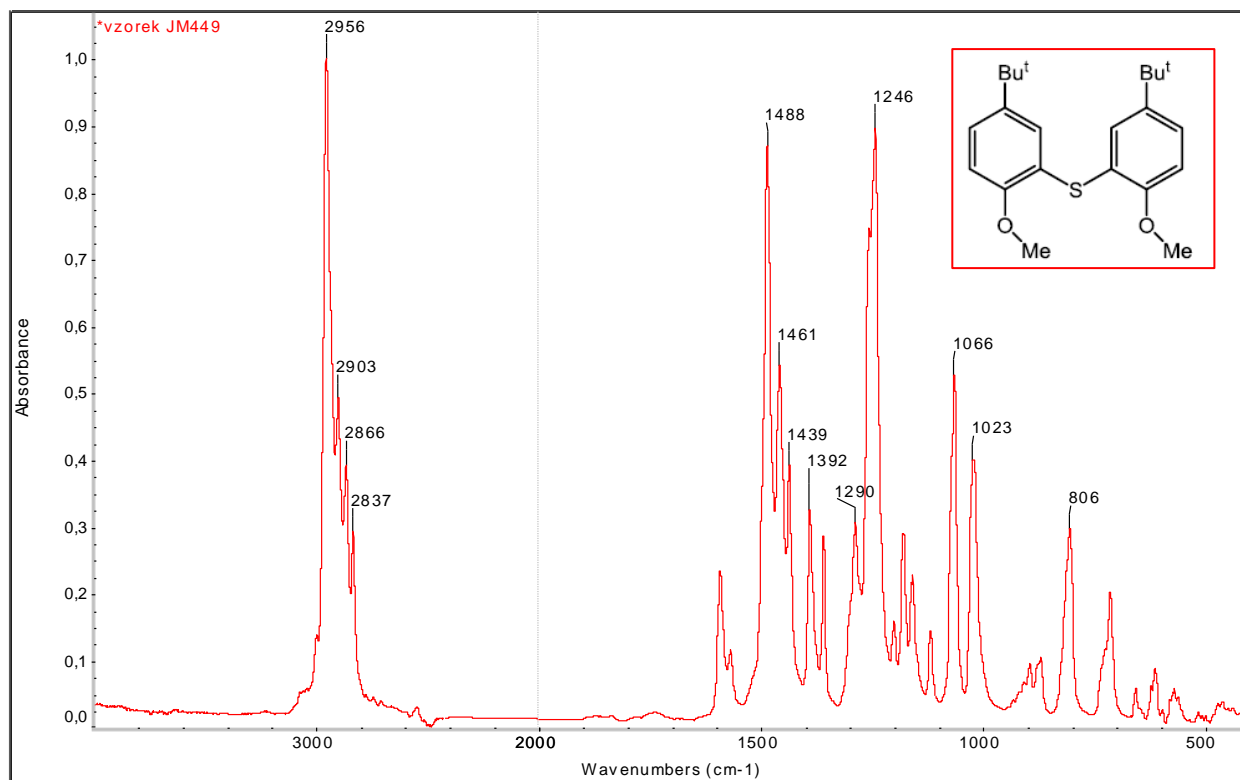

IR (ATR) spectrum of compound **18**

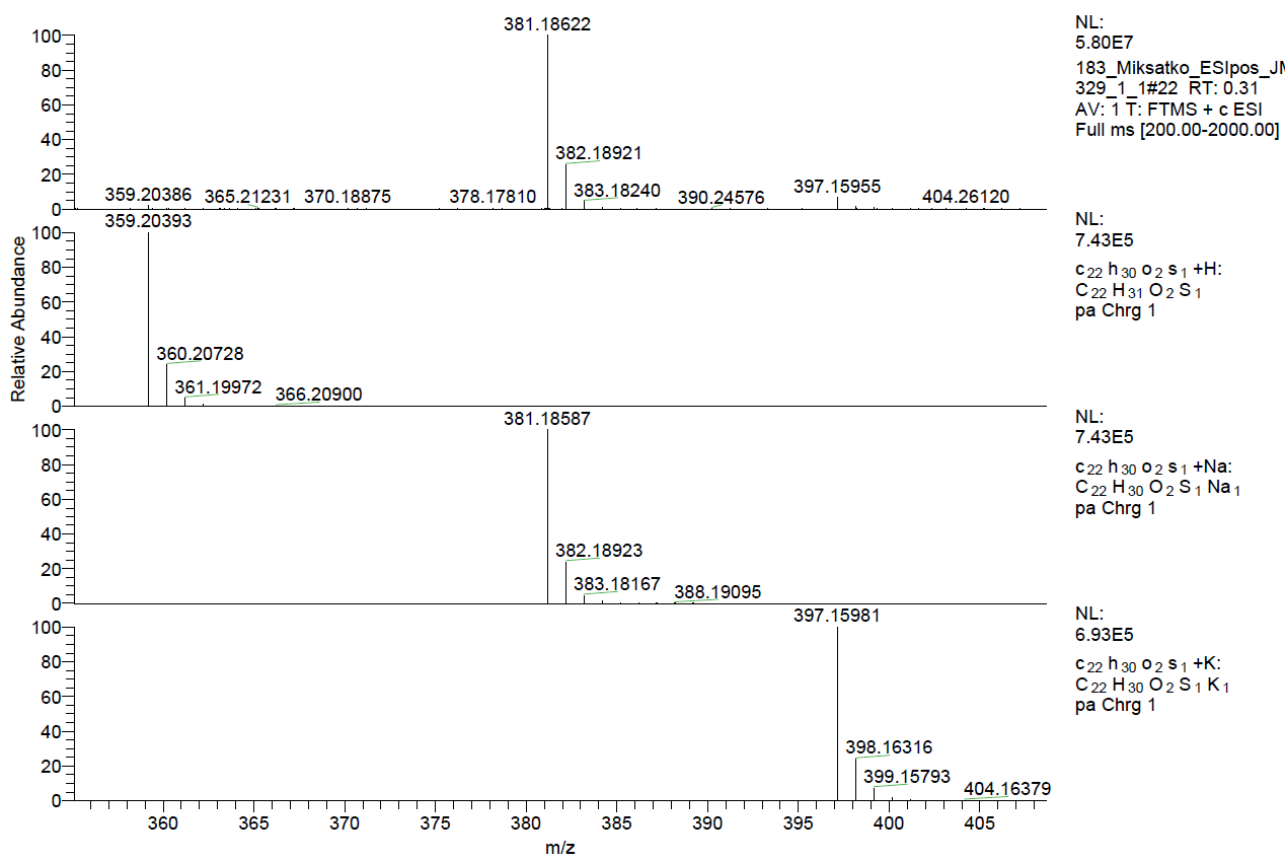

HRMS (ESI<sup>+</sup>) spectrum of compound **18**

## Compound 10

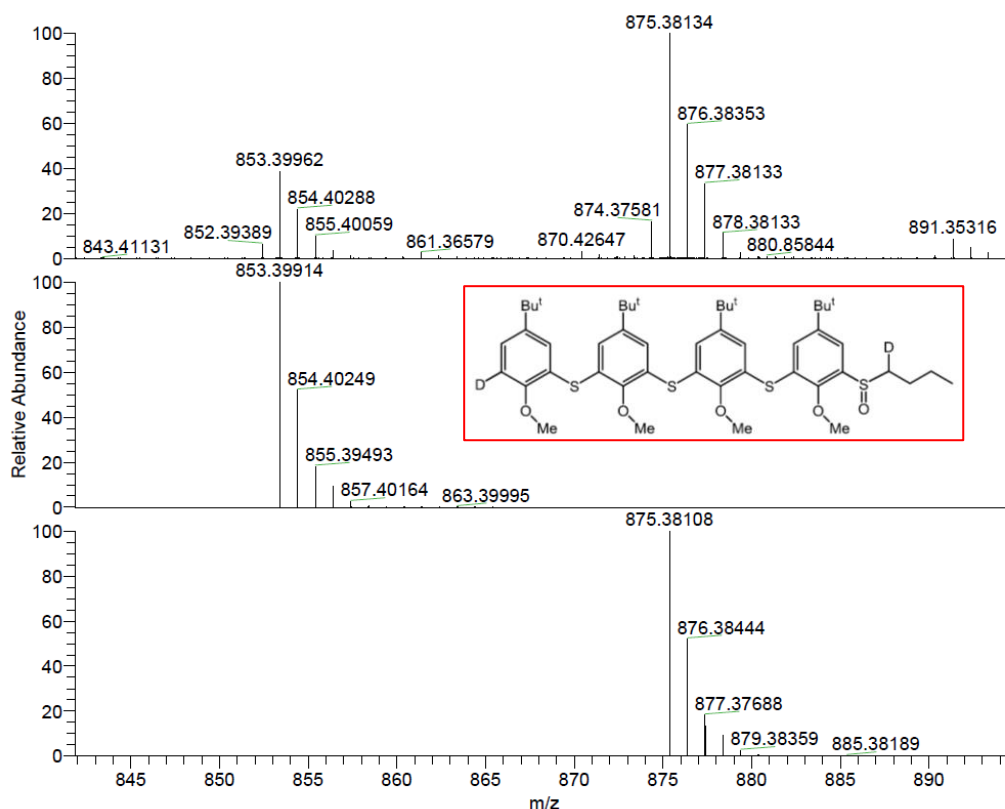

NL:  
1.52E7  
167\_Miksatko\_ESIpos\_JM  
447\_2\_1#31-34 RT:  
0.66-0.73 AV: 4 T: FTMS  
+ c ESI Full ms  
[200.00-2000.00]

NL:  
4.75E5  
C<sub>48</sub> H<sub>64</sub> D<sub>2</sub> O<sub>5</sub> S<sub>4</sub> +H:  
C<sub>48</sub> H<sub>64</sub> D<sub>2</sub> O<sub>5</sub> S<sub>4</sub>  
pa Chrg 1

NL:  
4.75E5  
C<sub>48</sub> H<sub>64</sub> D<sub>2</sub> O<sub>5</sub> S<sub>4</sub> +Na:  
C<sub>48</sub> H<sub>64</sub> D<sub>2</sub> O<sub>5</sub> S<sub>4</sub> Na<sub>1</sub>  
pa Chrg 1

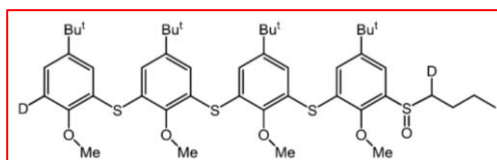

HRMS (ESI<sup>+</sup>) spectrum of compound 10

## Compound 11

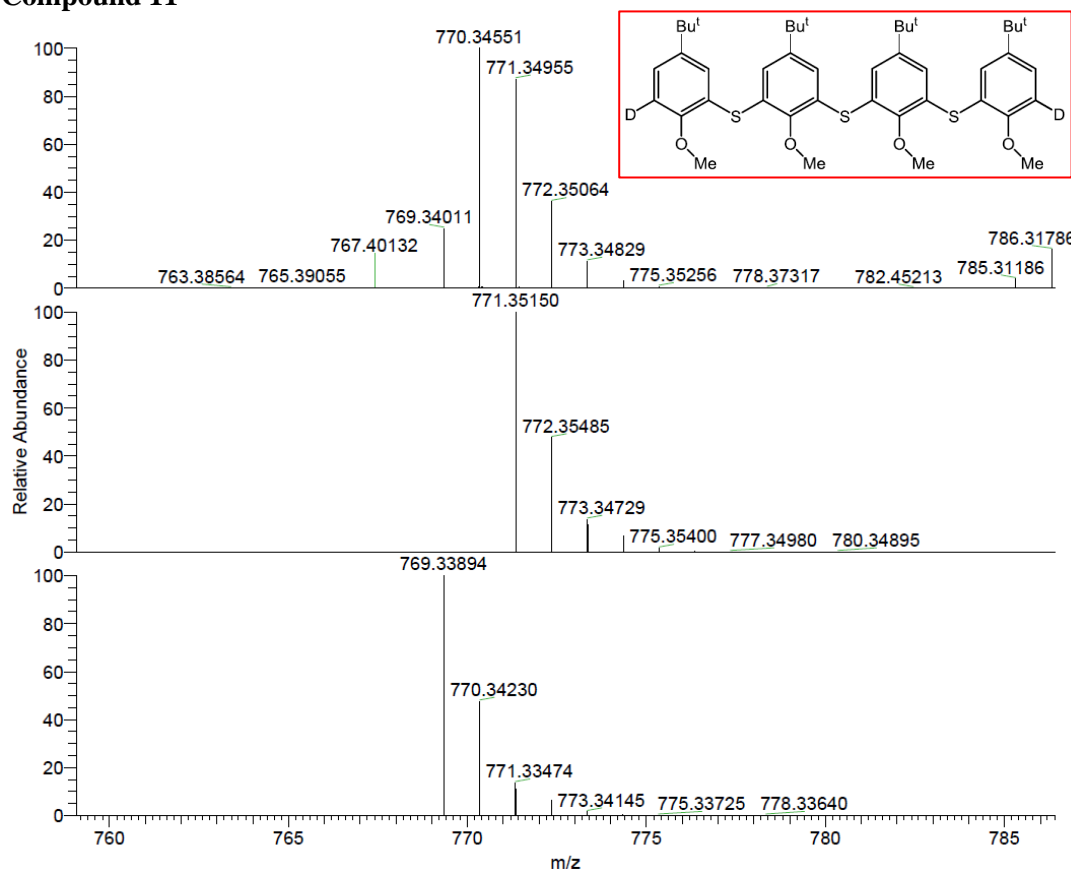

NL:  
9.39E6  
124\_Miksatko\_ESIpos\_J  
M434\_2#23-31 RT:  
0.52-0.73 AV: 9 T:  
FTMS + c ESI Full ms  
[200.00-2000.00]

NL:  
5.24E5  
C<sub>44</sub> H<sub>56</sub> D<sub>2</sub> O<sub>4</sub> S<sub>3</sub> +Na:  
C<sub>44</sub> H<sub>56</sub> D<sub>2</sub> O<sub>4</sub> S<sub>3</sub> Na<sub>1</sub>  
pa Chrg 1

NL:  
5.24E5  
C<sub>44</sub> H<sub>58</sub> O<sub>4</sub> S<sub>3</sub> +Na:  
C<sub>44</sub> H<sub>58</sub> O<sub>4</sub> S<sub>3</sub> Na<sub>1</sub>  
pa Chrg 1

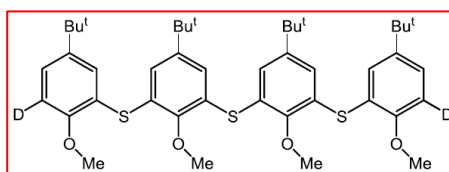

HRMS (ESI<sup>+</sup>) spectrum of compound 11

## Compounds 13 and 14

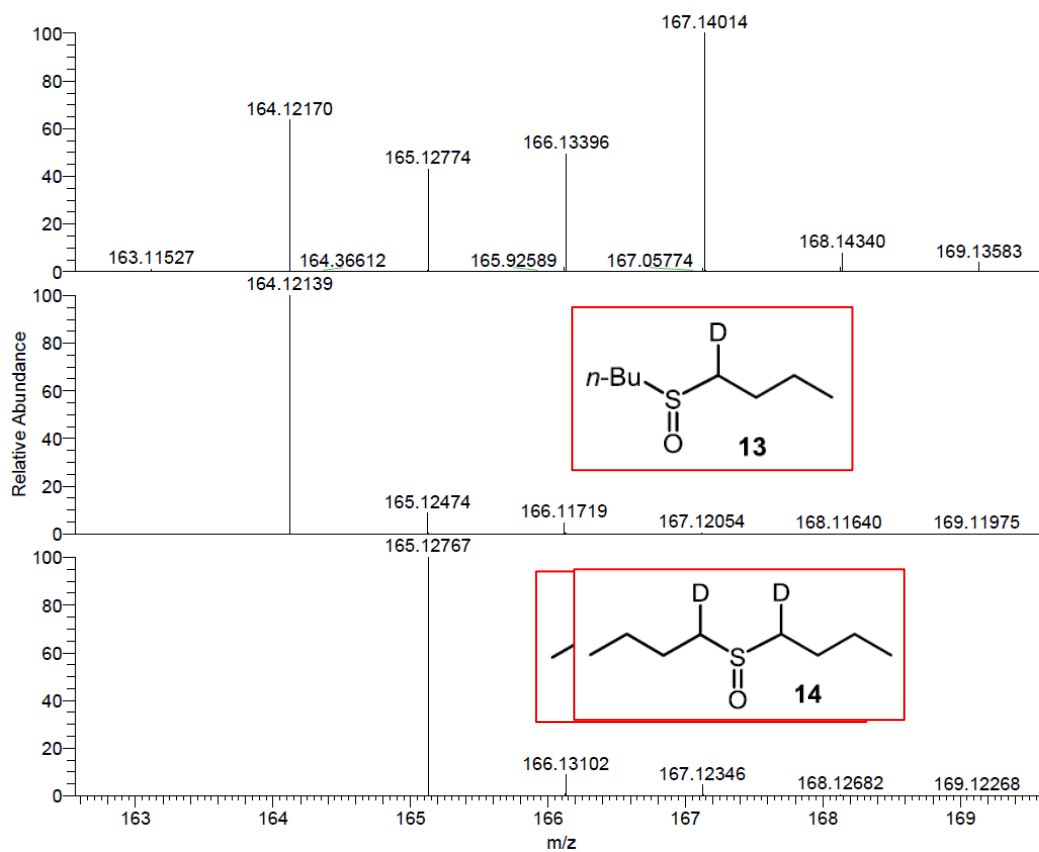

NL:  
8.69E6  
167\_Miksatko\_ESIpos\_J  
M447\_X\_2#26-28 RT:  
0.55-0.59 AV: 3 T: FTMS  
+ c ESI Full ms  
[50.00-1000.00]

NL:  
8.67E5  
C<sub>8</sub>H<sub>17</sub>D<sub>1</sub>O<sub>1</sub>S<sub>1</sub>+H:  
C<sub>8</sub>H<sub>18</sub>D<sub>1</sub>O<sub>1</sub>S<sub>1</sub>  
pa Chrg 1

NL:  
8.67E5  
C<sub>8</sub>H<sub>16</sub>D<sub>2</sub>O<sub>1</sub>S<sub>1</sub>+H:  
C<sub>8</sub>H<sub>17</sub>D<sub>2</sub>O<sub>1</sub>S<sub>1</sub>  
pa Chrg 1

HRMS (ESI<sup>+</sup>) spectrum of compounds **13** and **14**

# Compound 19

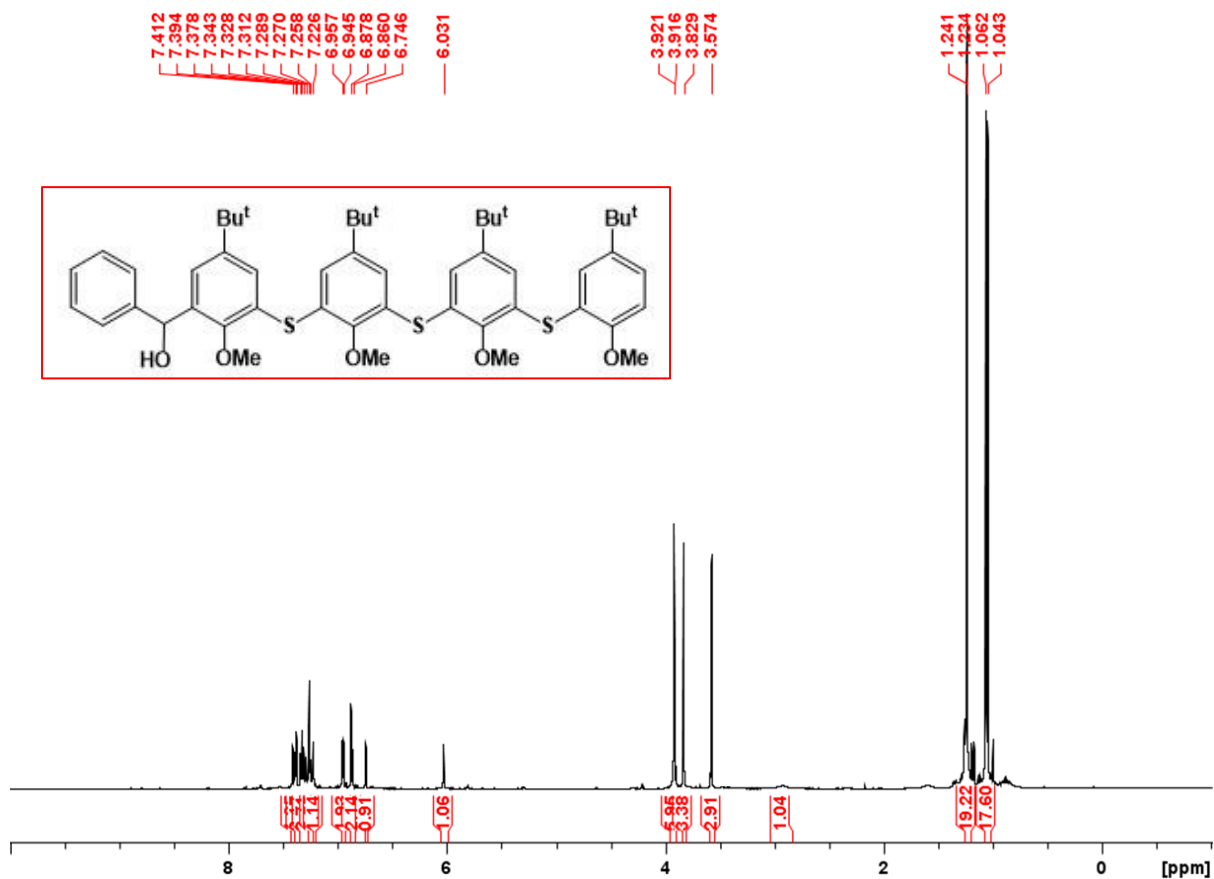

<sup>1</sup>H NMR spectrum of compound 19 (CDCl<sub>3</sub>, 298K, 400 MHz)

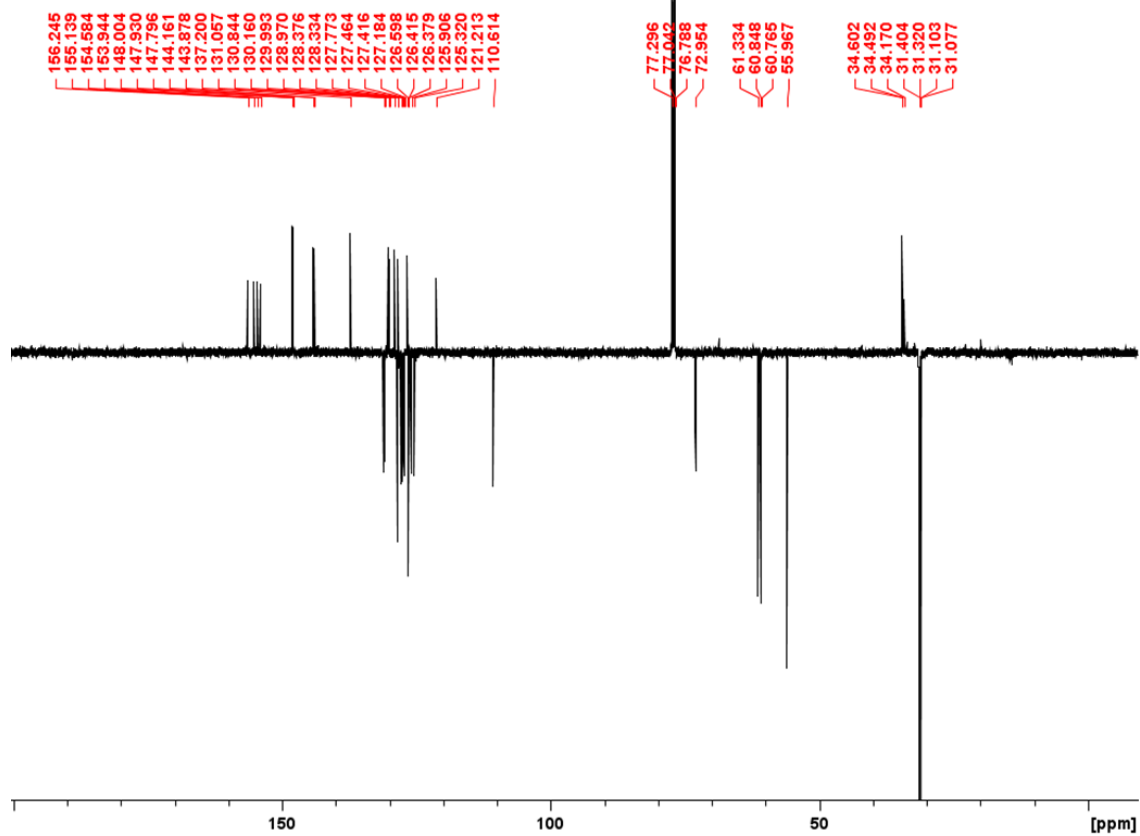

<sup>13</sup>C NMR (APT) spectrum of compound 19 (CDCl<sub>3</sub>, 298K, 100 MHz)

# Compound 19

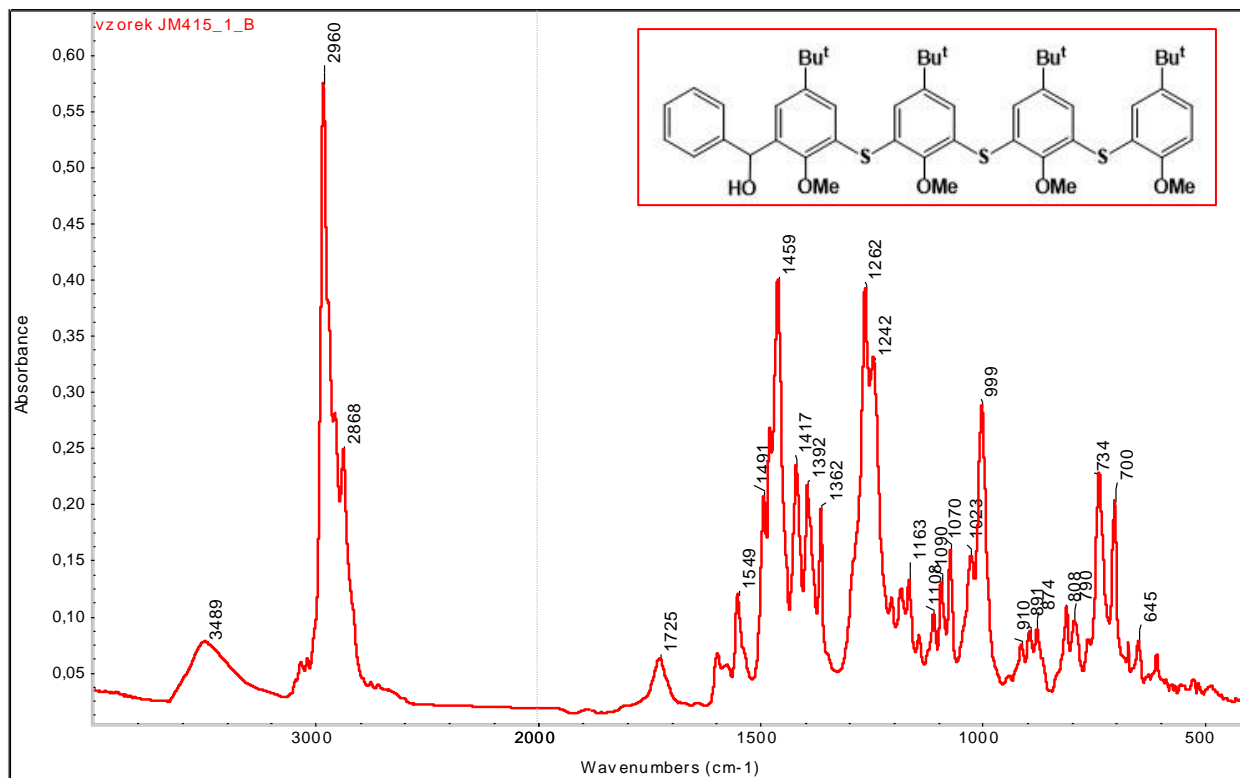

IR (ATR) spectrum of compound 19

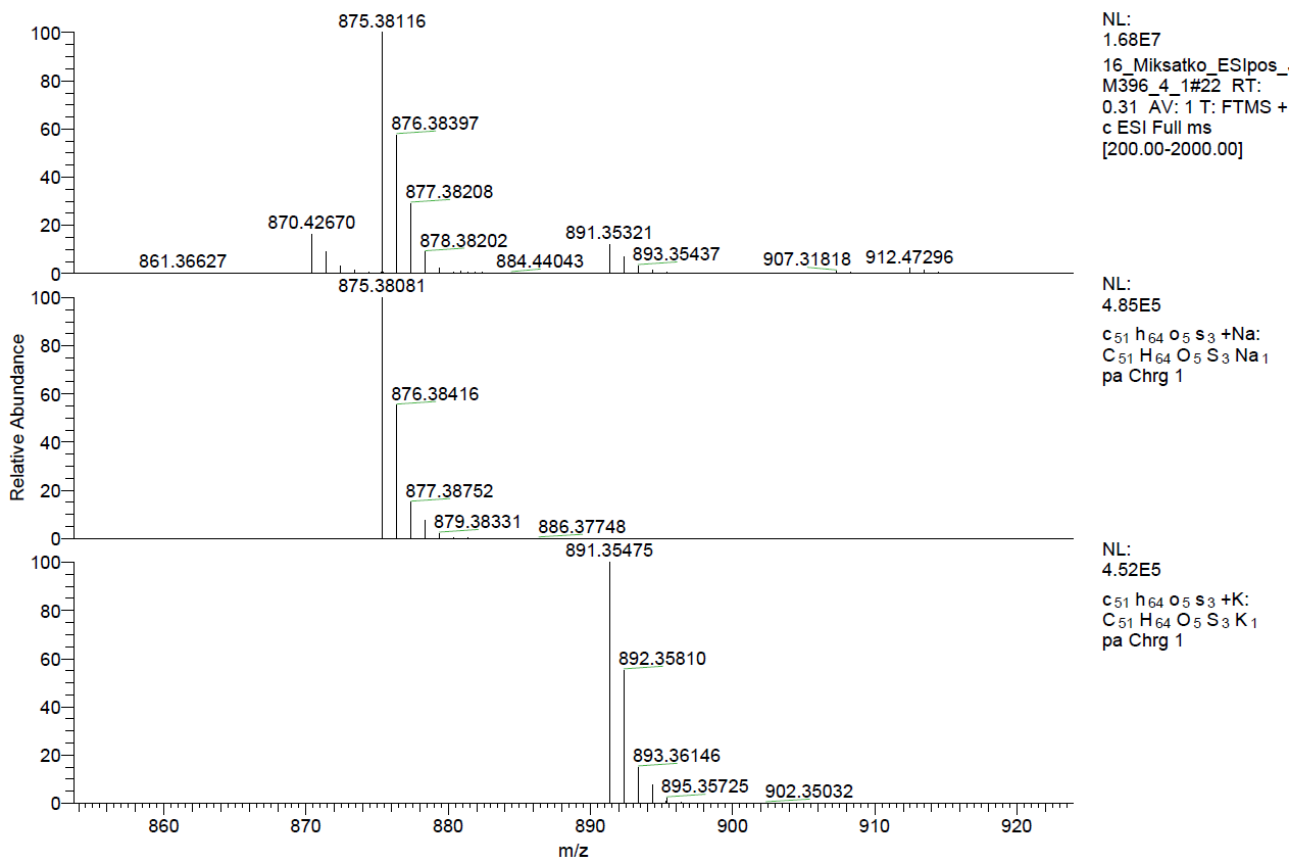

HRMS (ESI<sup>+</sup>) spectrum of compound 19

# Compound 20

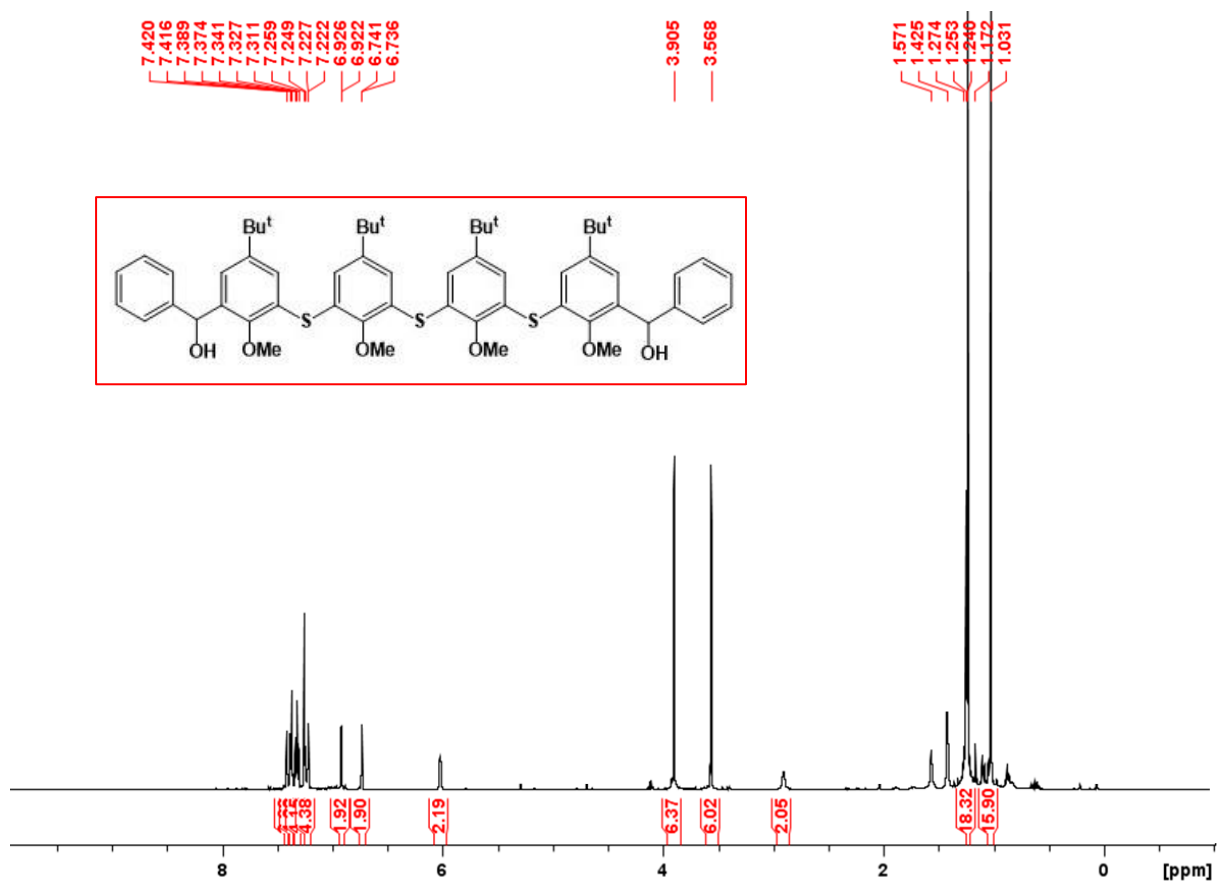

<sup>1</sup>H NMR spectrum of compound **20** (CDCl<sub>3</sub>, 298K, 400 MHz)

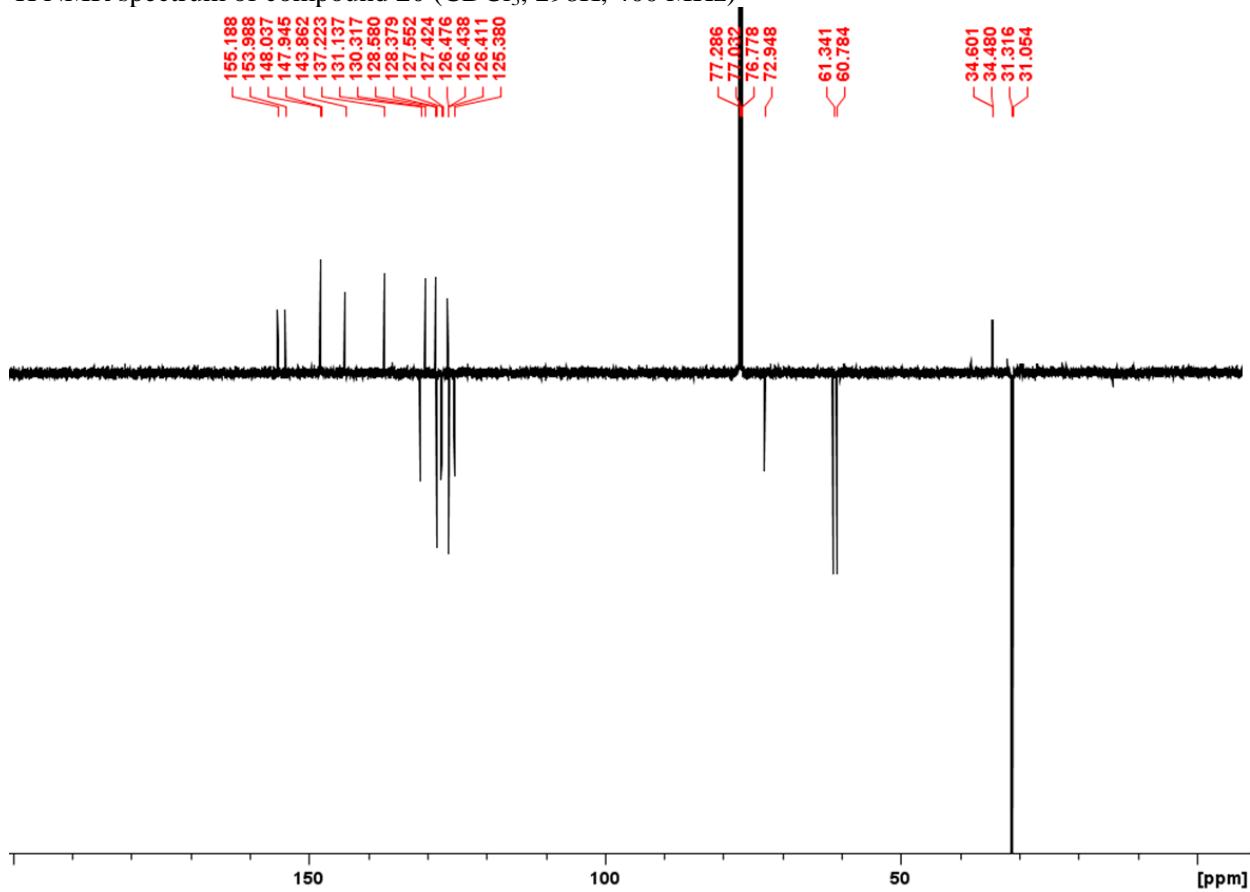

<sup>13</sup>C NMR (APT) spectrum of compound **20** (CDCl<sub>3</sub>, 298K, 100 MHz)

# Compound 20

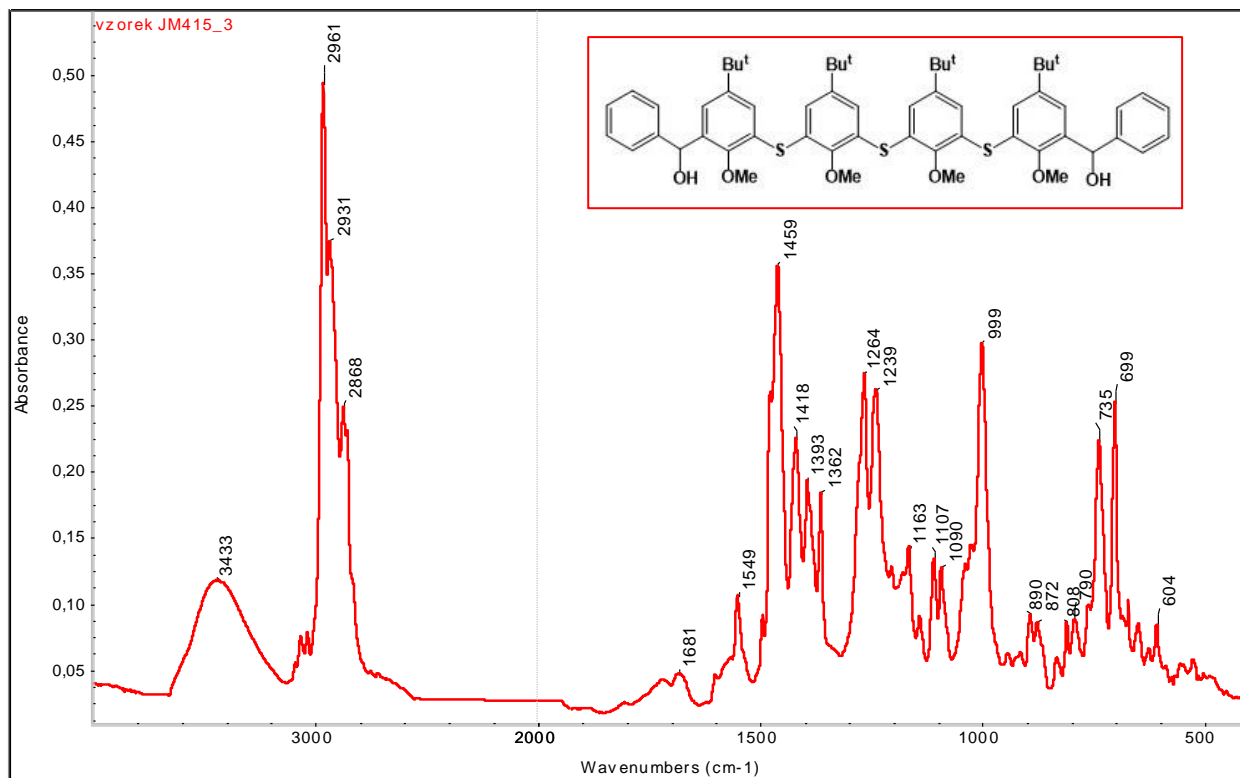

IR (ATR) spectrum of compound 20

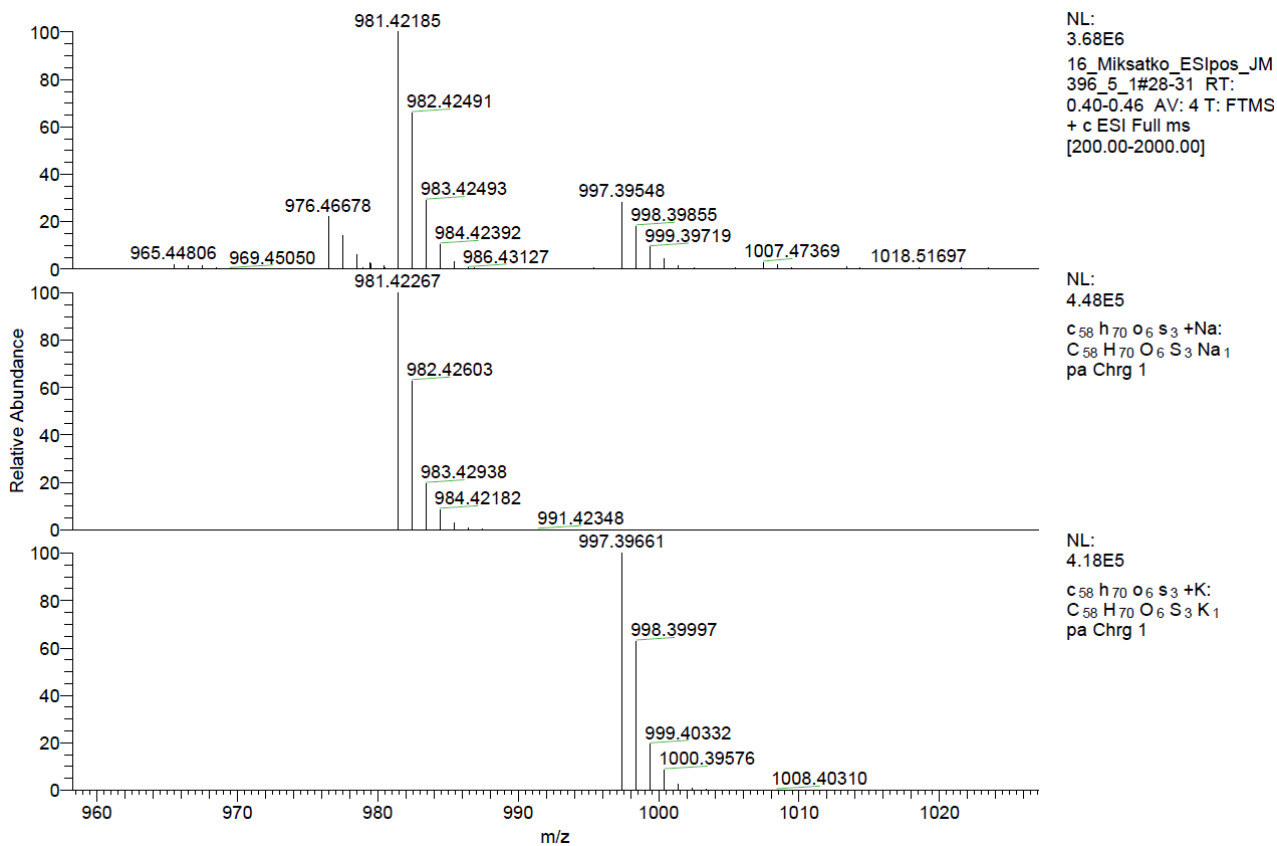

HRMS (ESI<sup>+</sup>) spectrum of compound 20

Compound 21

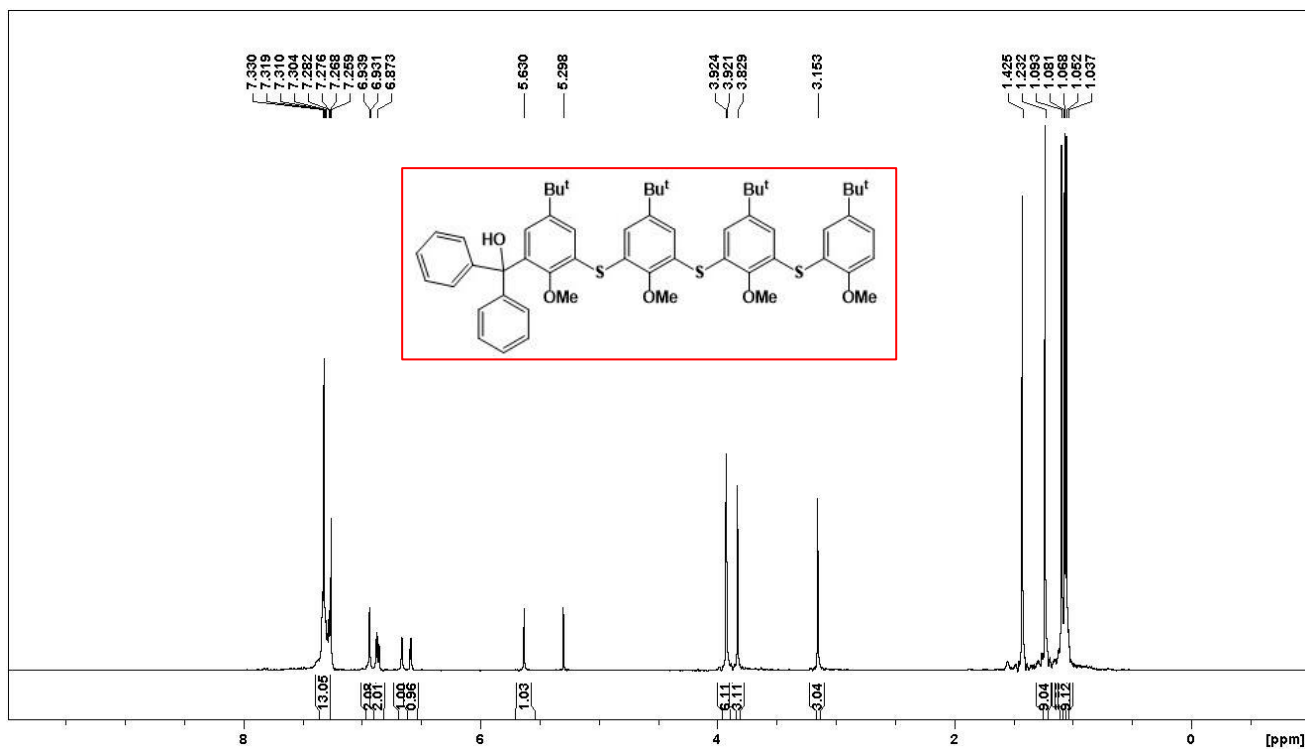

<sup>1</sup>H NMR spectrum of compound **21** (CDCl<sub>3</sub>, 298K, 400 MHz)

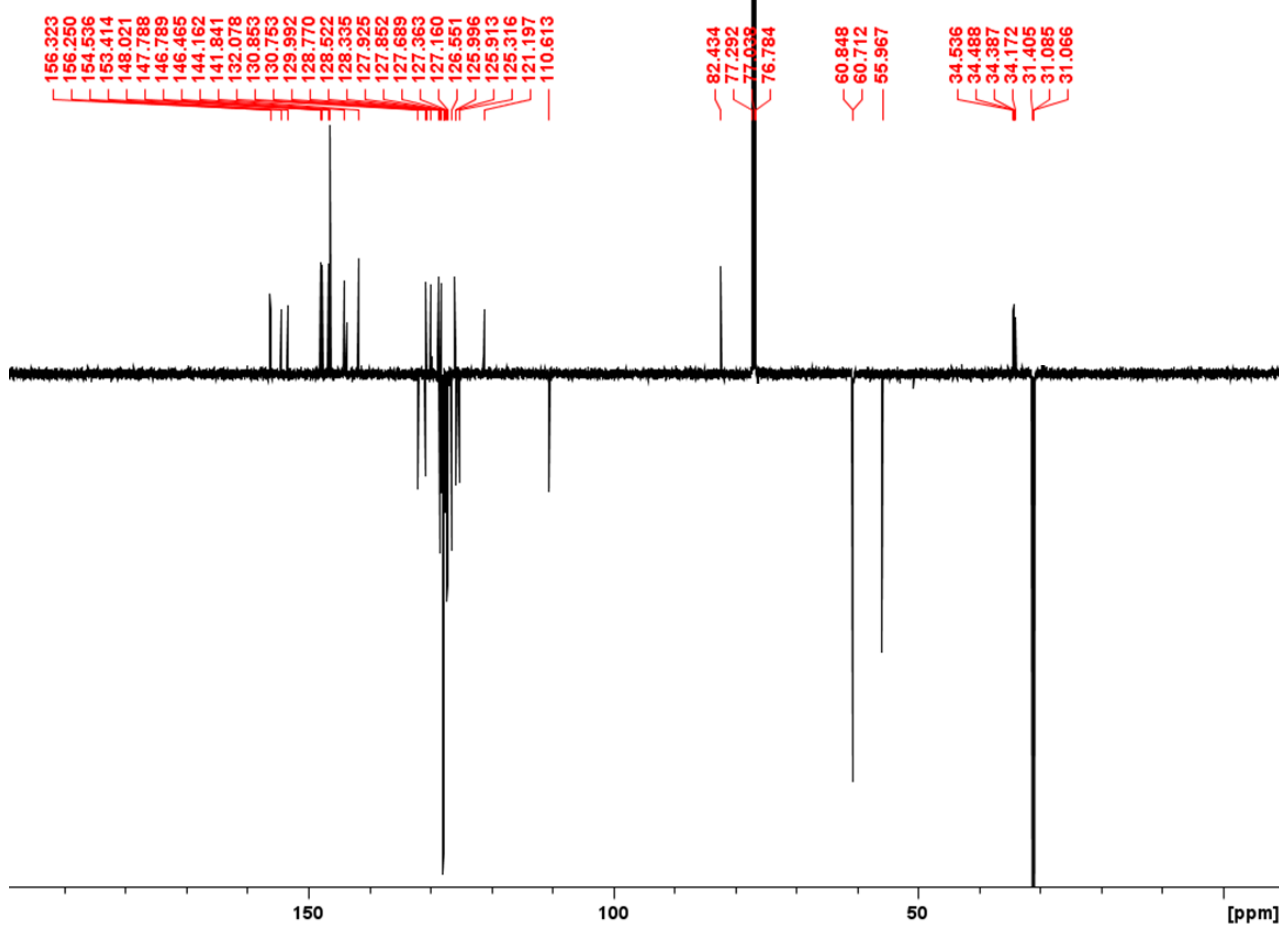

<sup>13</sup>C NMR (APT) spectrum of compound **21** (CDCl<sub>3</sub>, 298K, 100 MHz)



# Compound 21

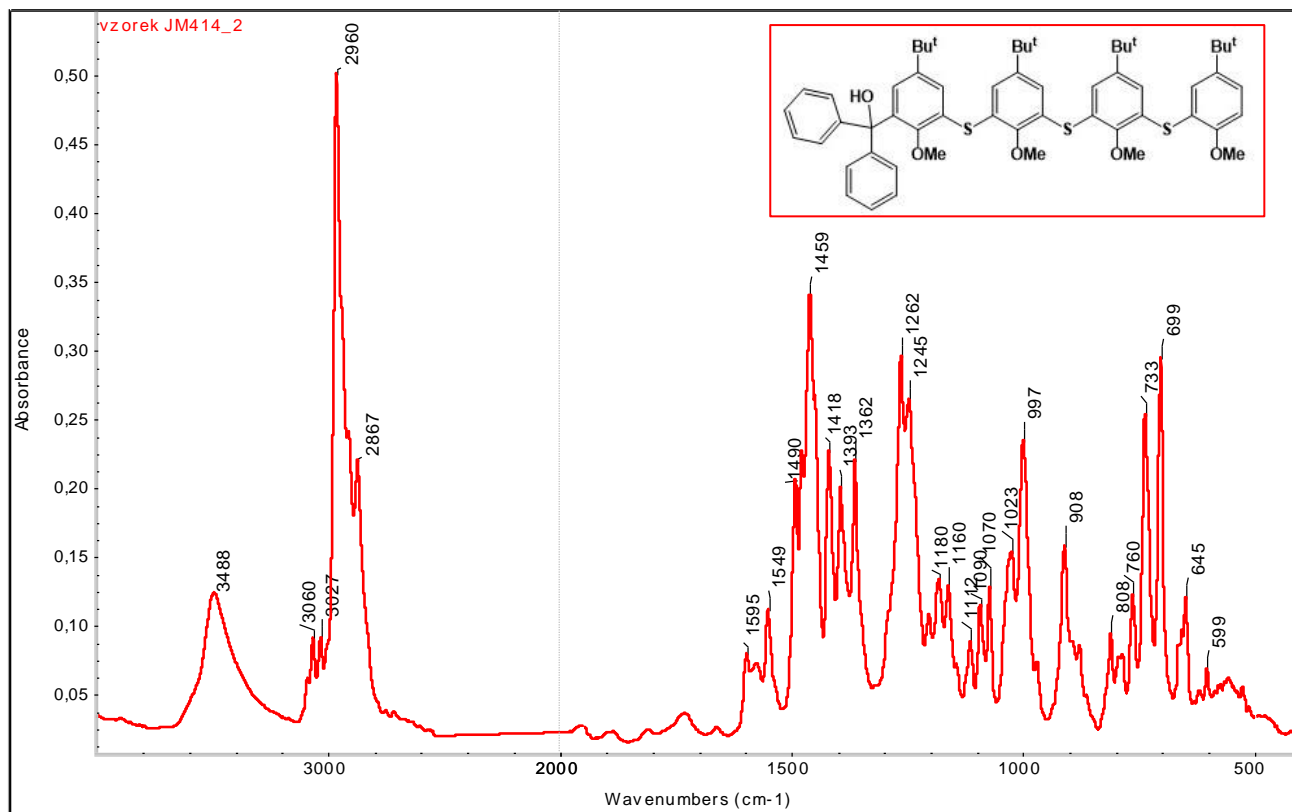

IR (ATR) spectrum of compound 21

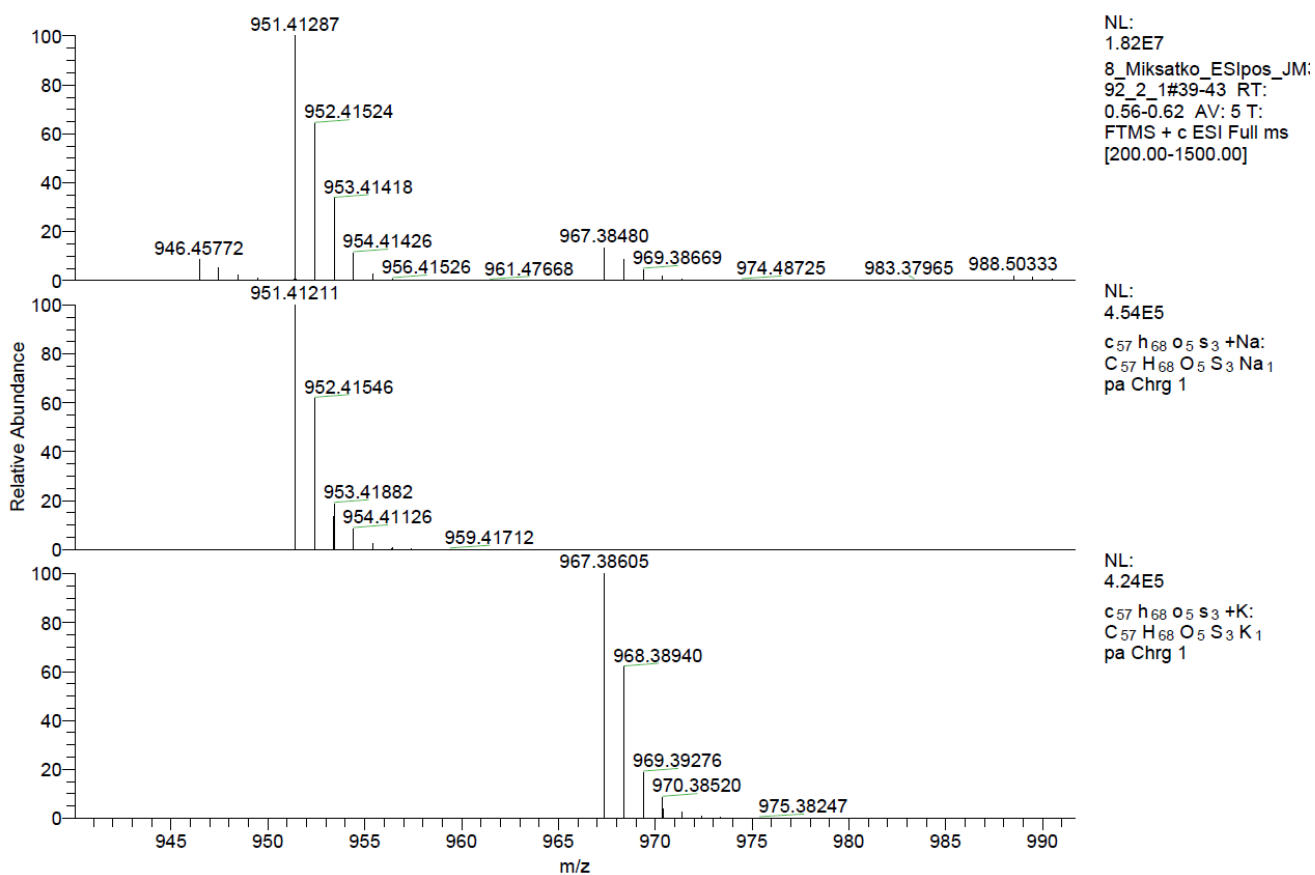

HRMS (ESI<sup>+</sup>) spectrum of compound 21

Compound 22

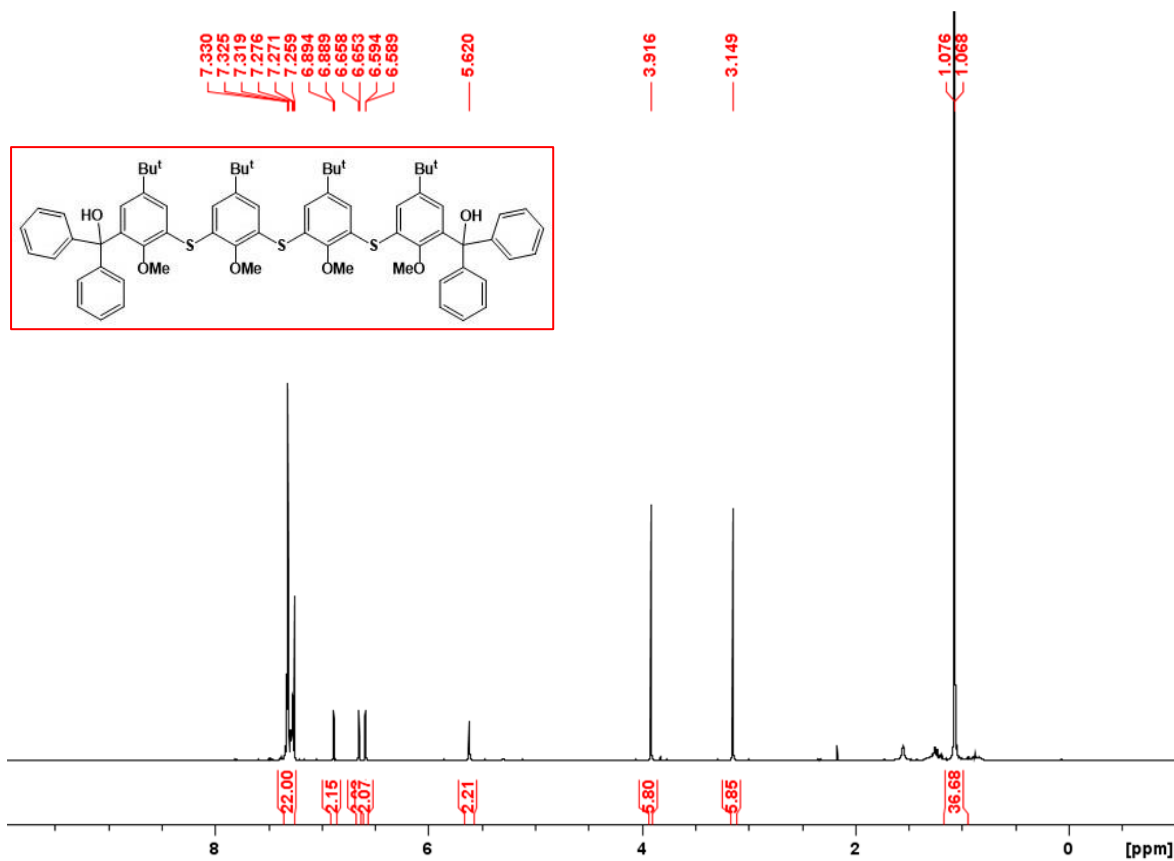

<sup>1</sup>H NMR spectrum of compound 22 (CDCl<sub>3</sub>, 298K, 400 MHz)

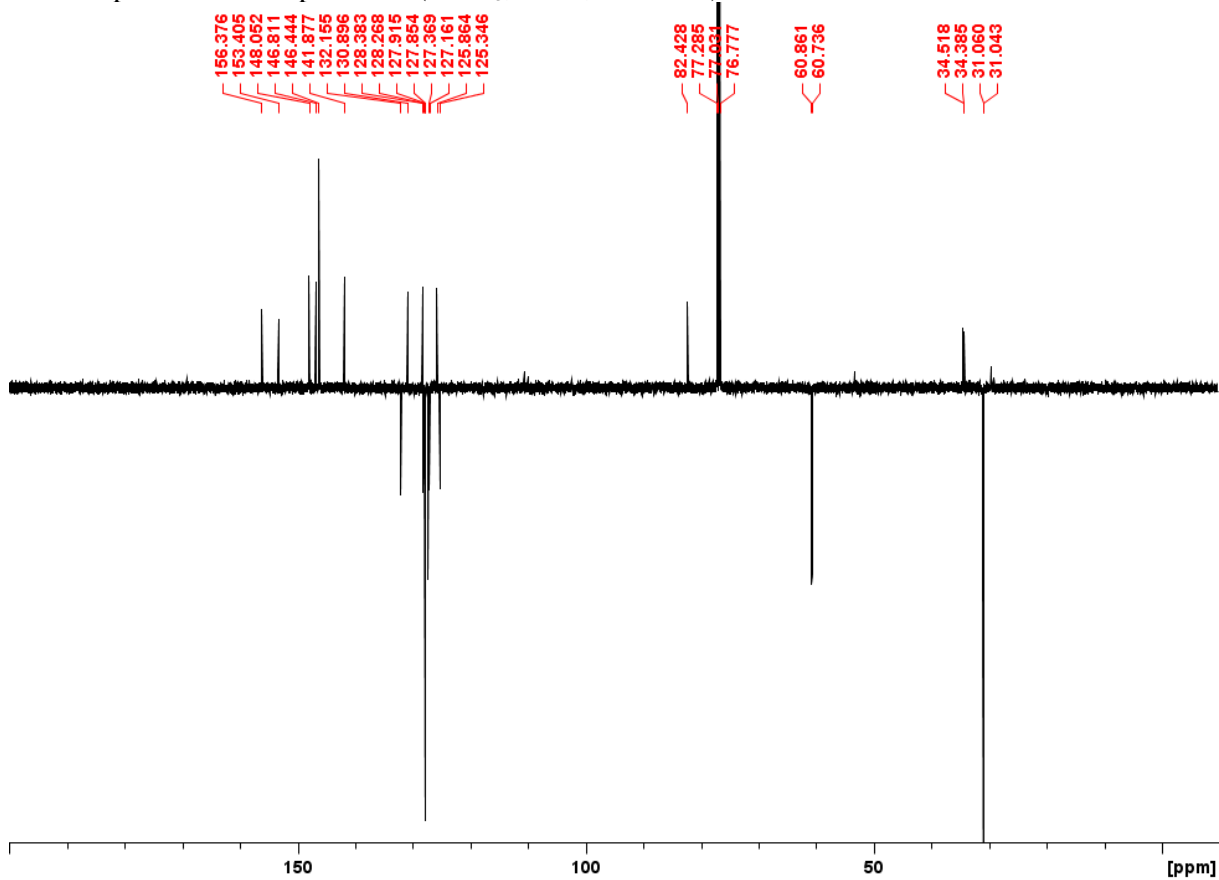

<sup>13</sup>C NMR (APT) spectrum of compound 22 (CDCl<sub>3</sub>, 298K, 100 MHz)

# Compound 22

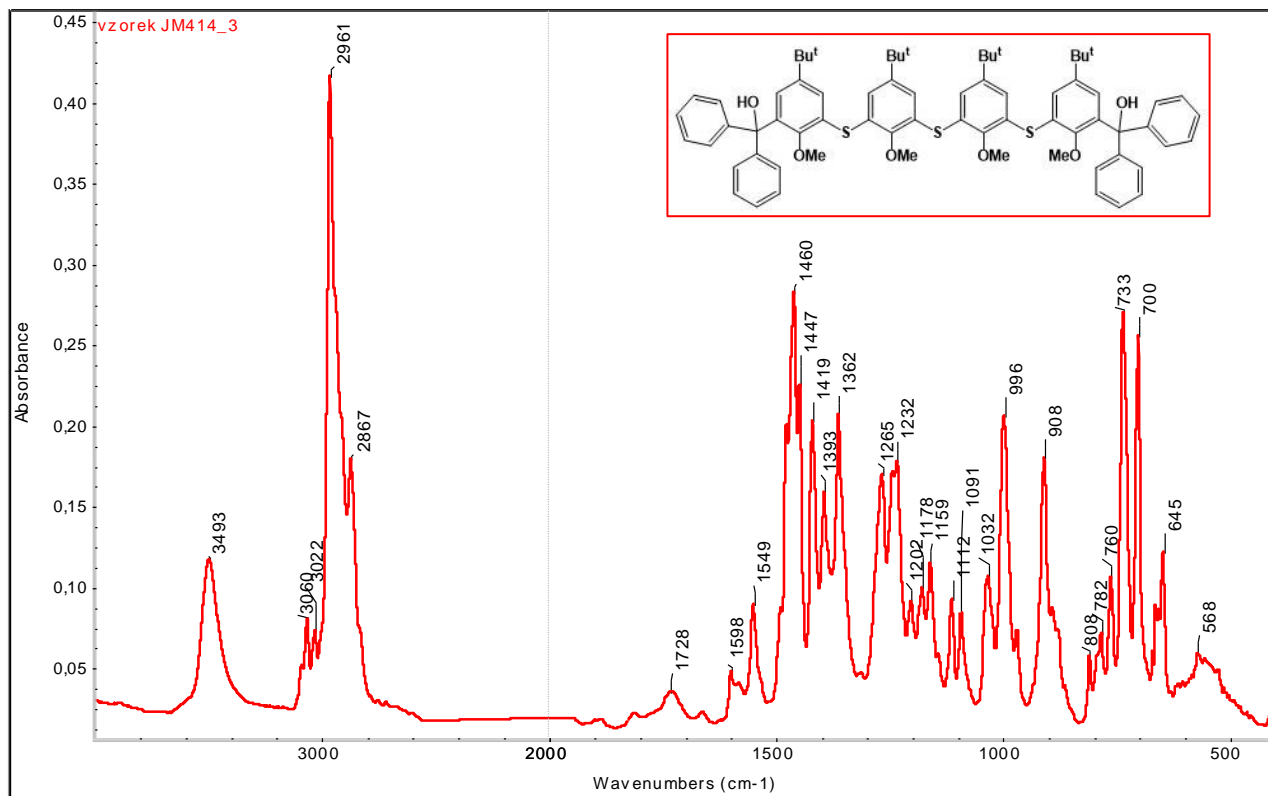

IR (ATR) spectrum of compound 22

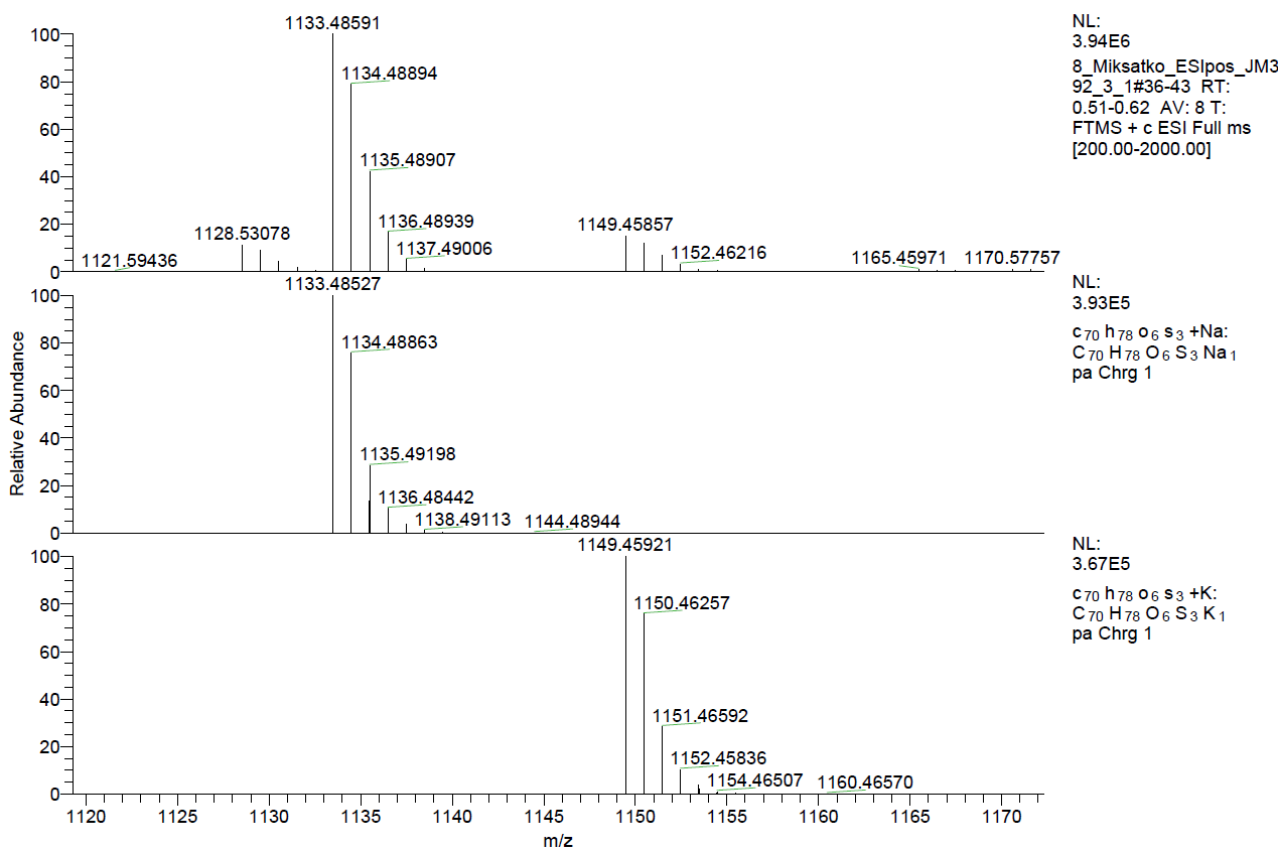

HRMS (ESI<sup>+</sup>) spectrum of compound 22

Compound **23**

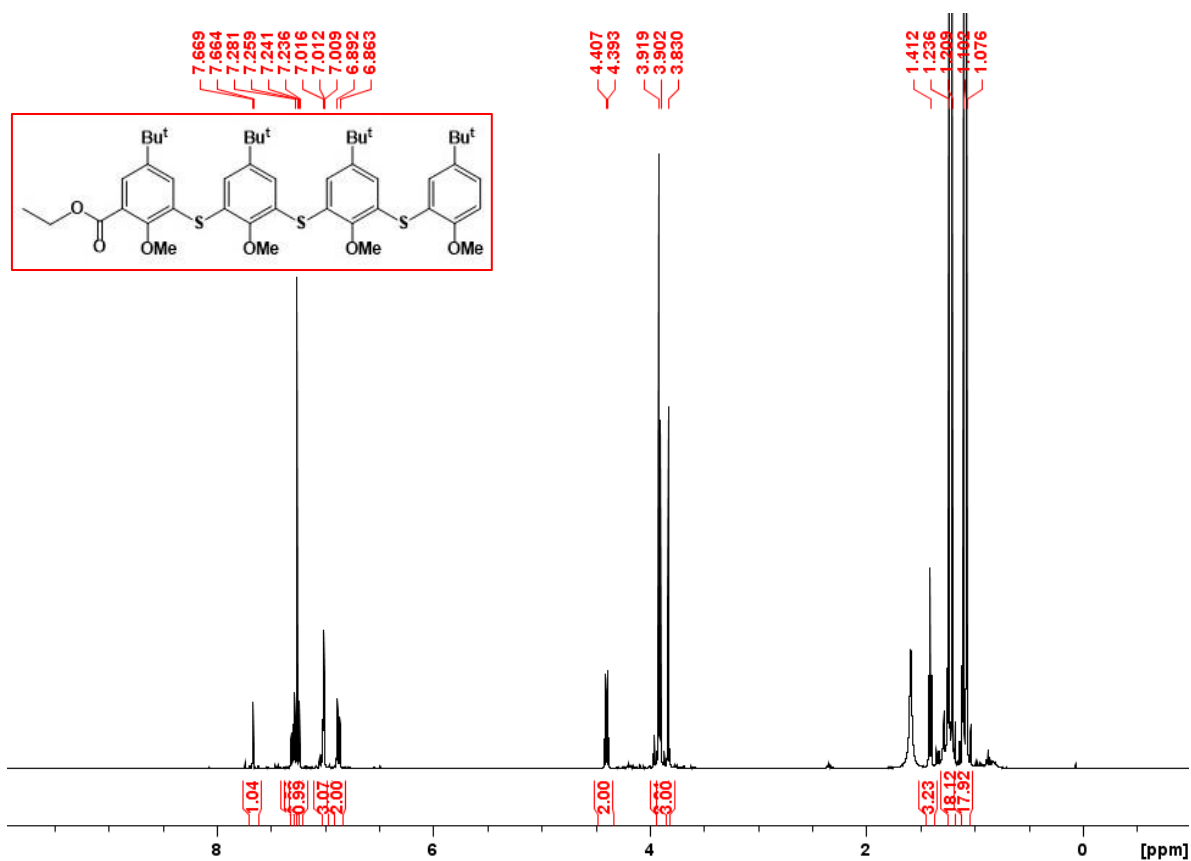

<sup>1</sup>H NMR spectrum of compound **23** (CDCl<sub>3</sub>, 298K, 400 MHz)

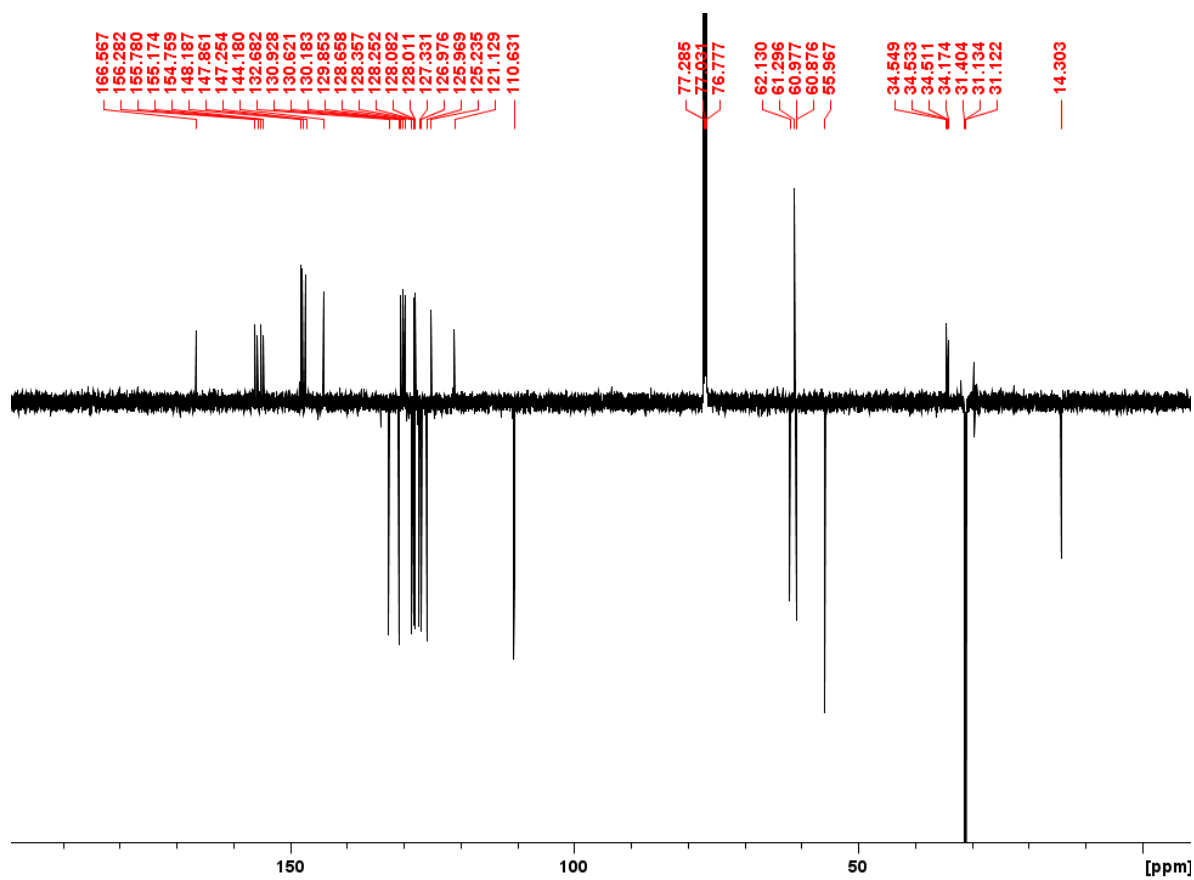

<sup>13</sup>C NMR (APT) spectrum of compound **23** (CDCl<sub>3</sub>, 298K, 100 MHz)

# Compound 23

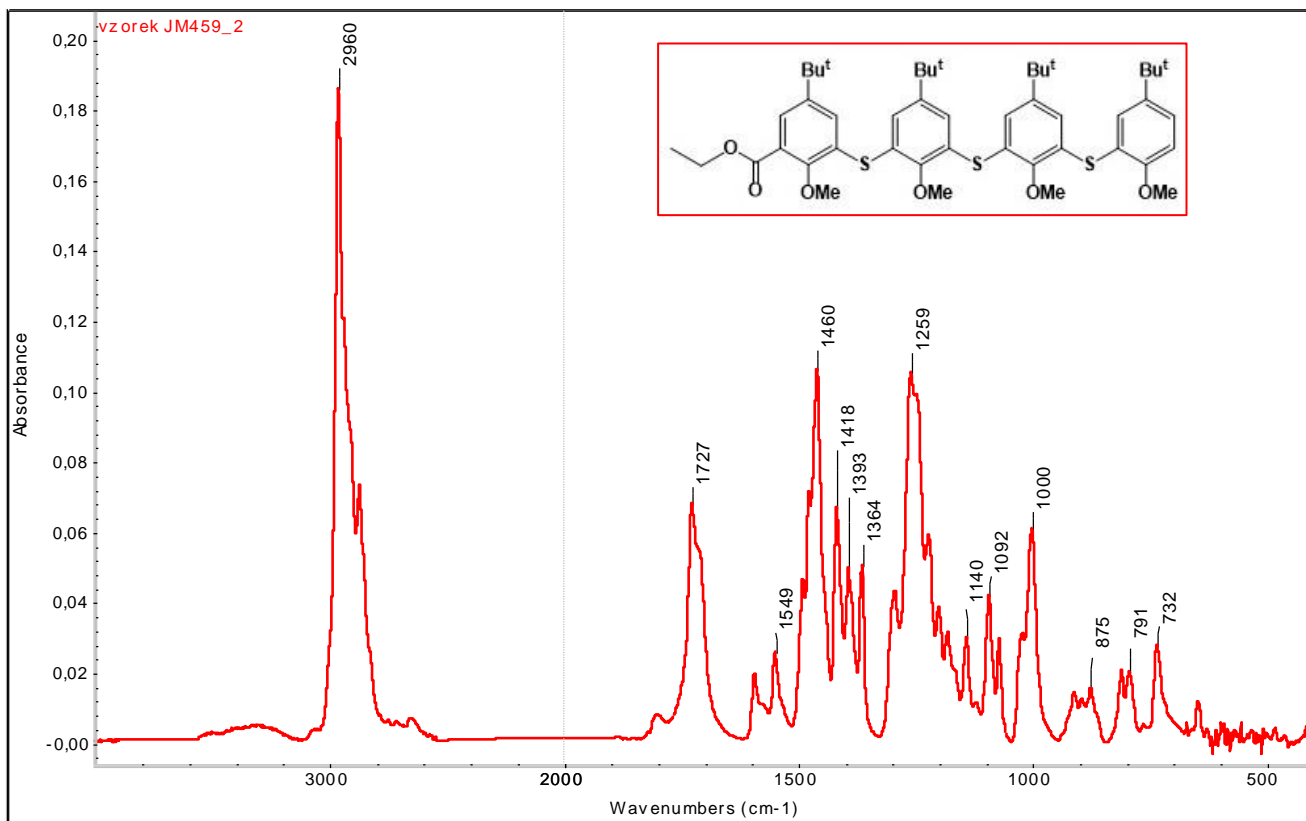

IR (ATR) spectrum of compound 23

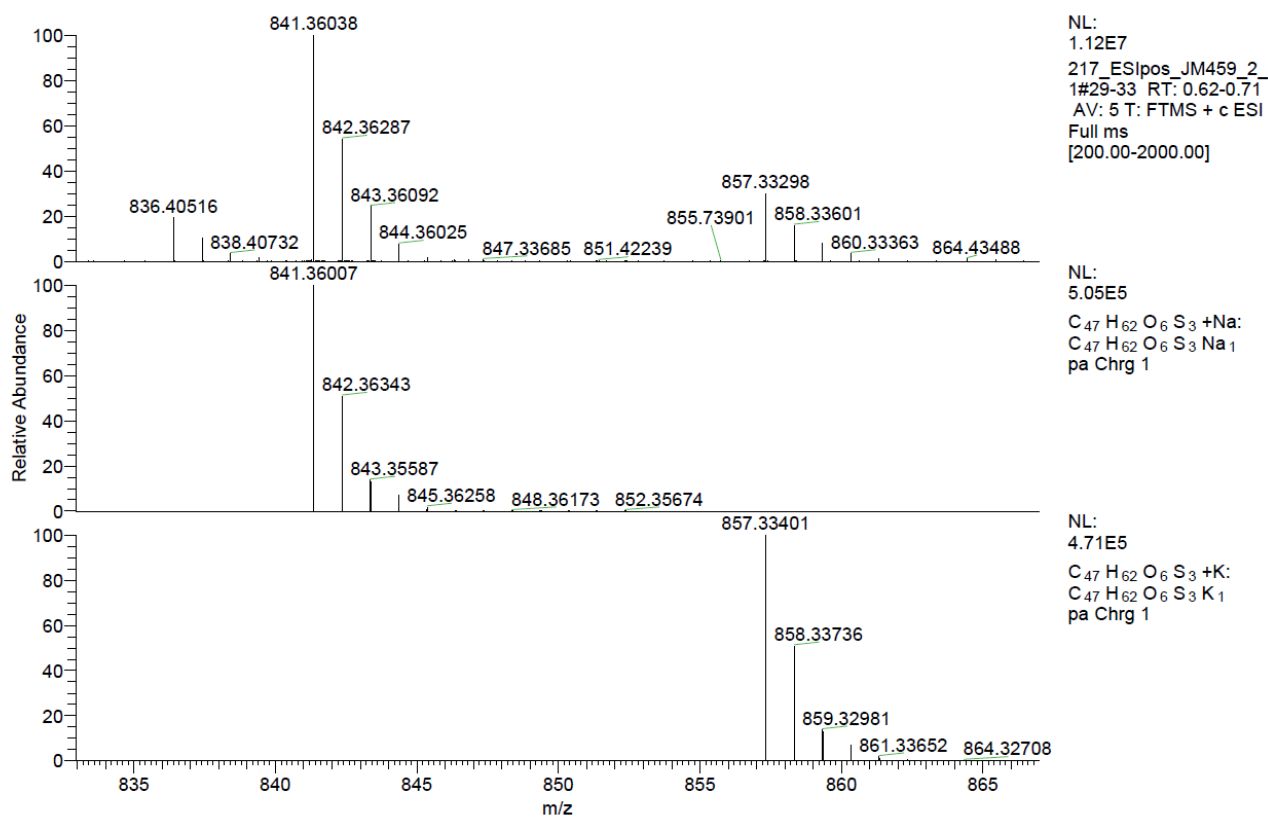

HRMS (ESI<sup>+</sup>) spectrum of compound 23

Compound 24

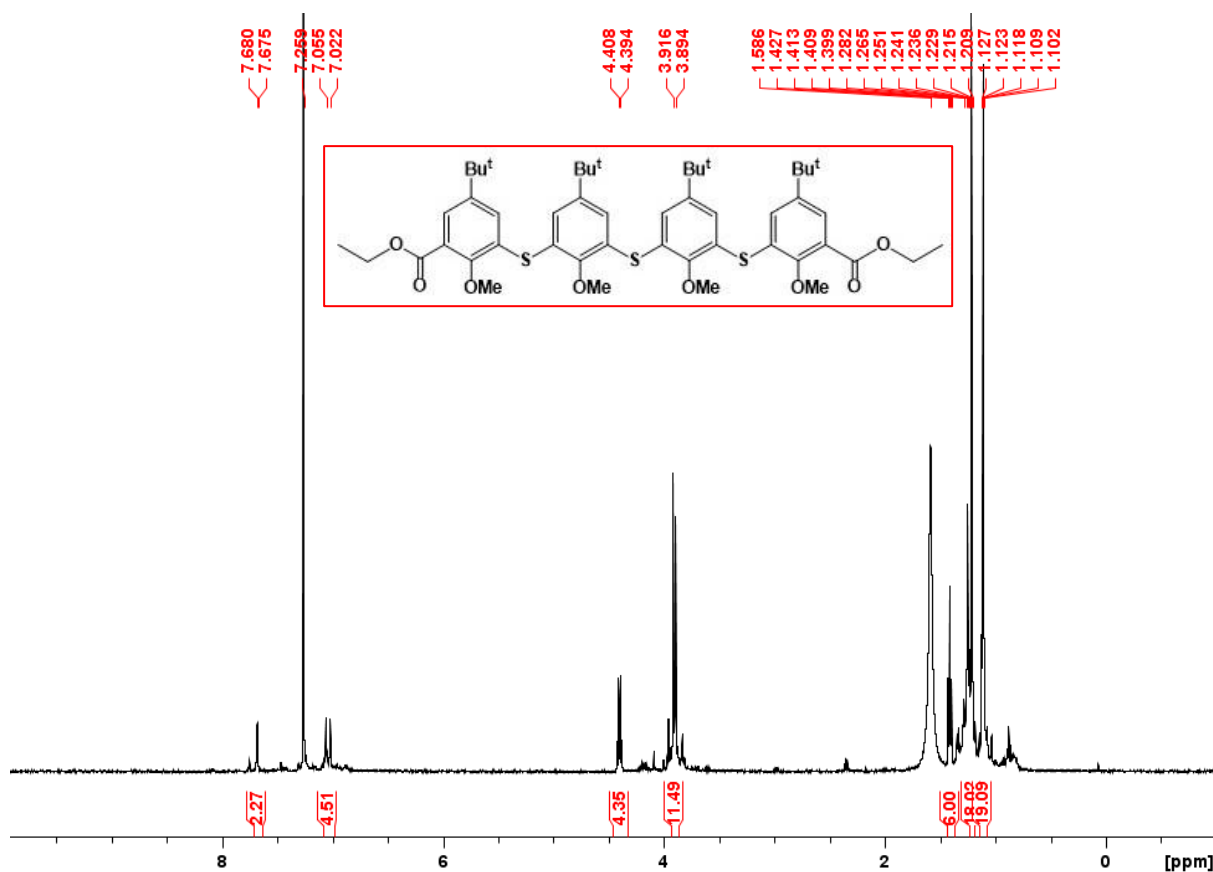

<sup>1</sup>H NMR spectrum of compound **24** (CDCl<sub>3</sub>, 298K, 400 MHz)

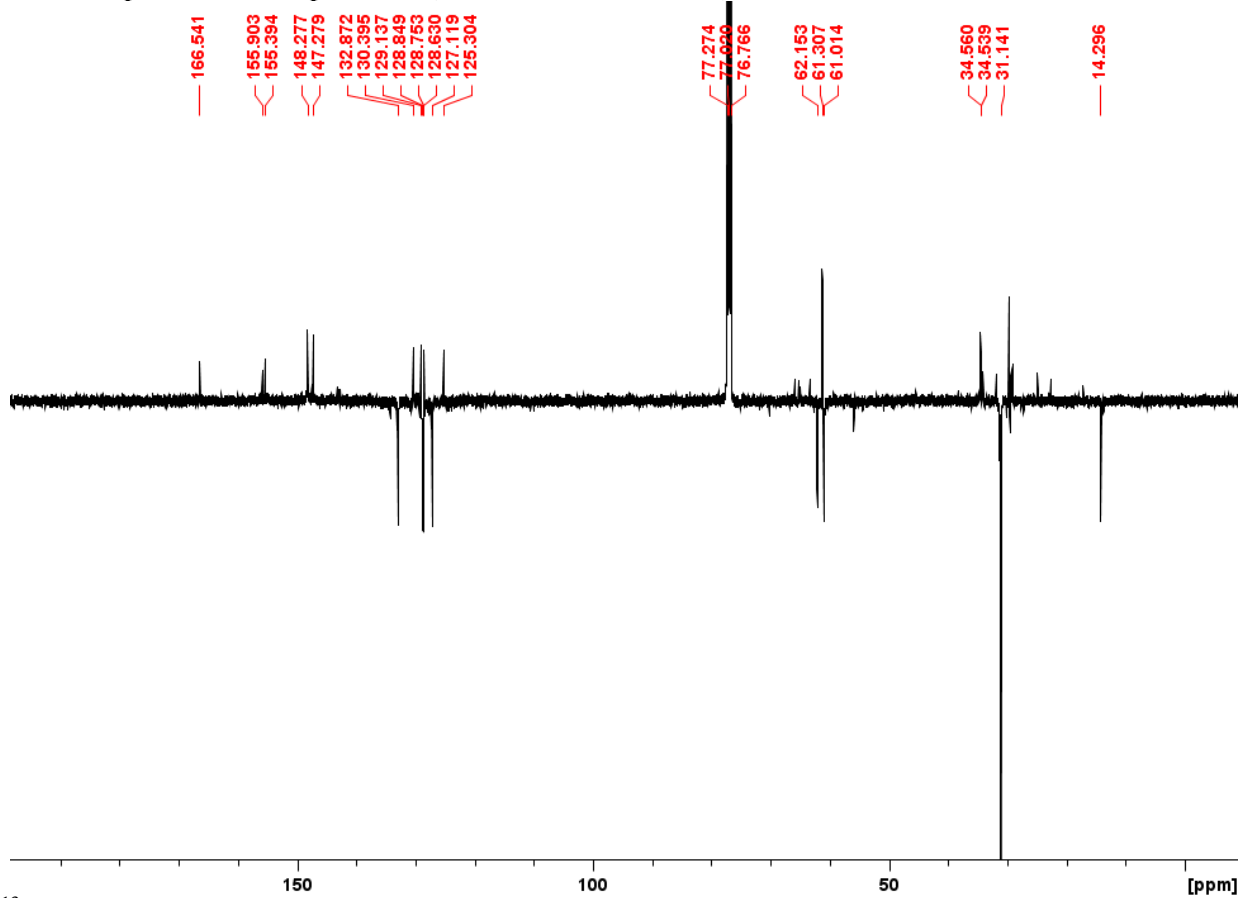

<sup>13</sup>C NMR (APT) spectrum of compound **24** (CDCl<sub>3</sub>, 298K, 100 MHz)

# Compound 24

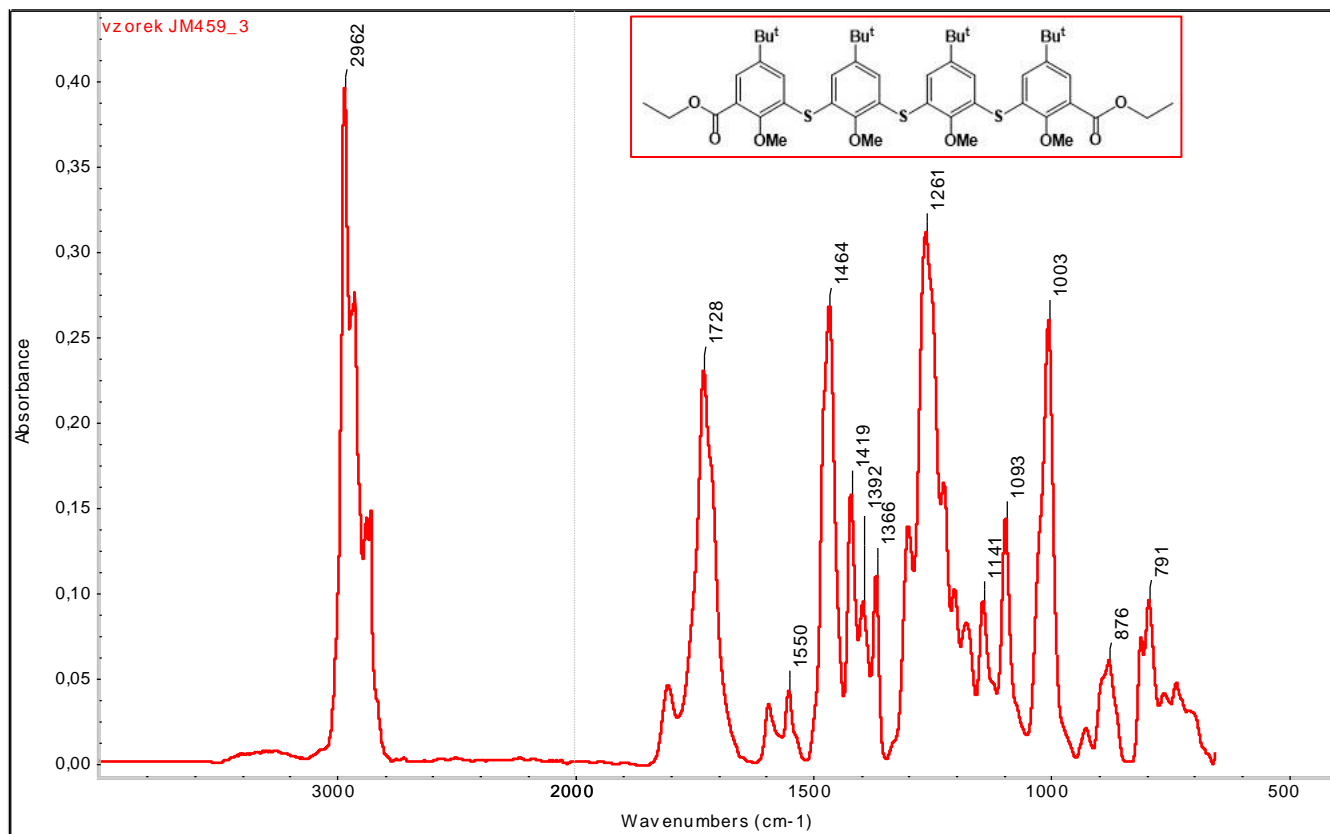

IR (ATR) spectrum of compound 24

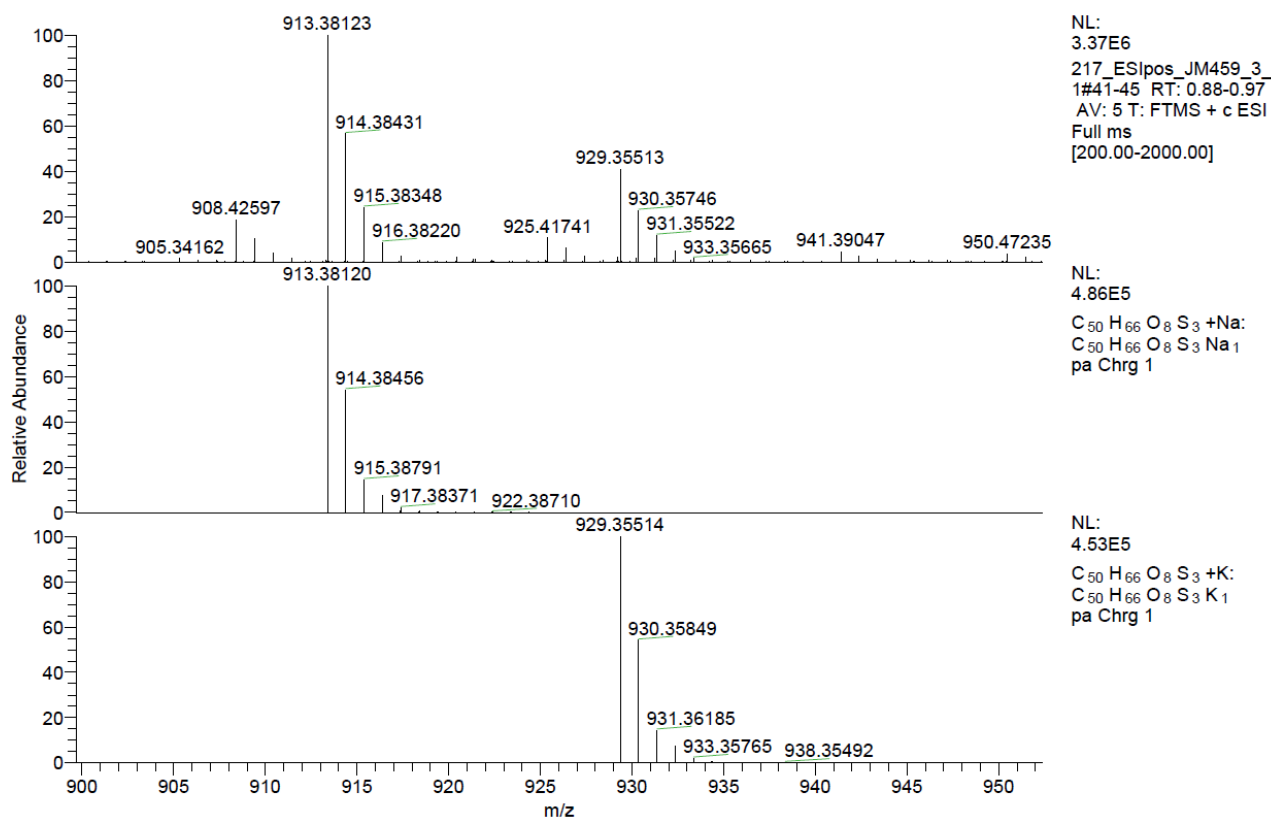

HRMS (ESI<sup>+</sup>) spectrum of compound 24

Compound 25

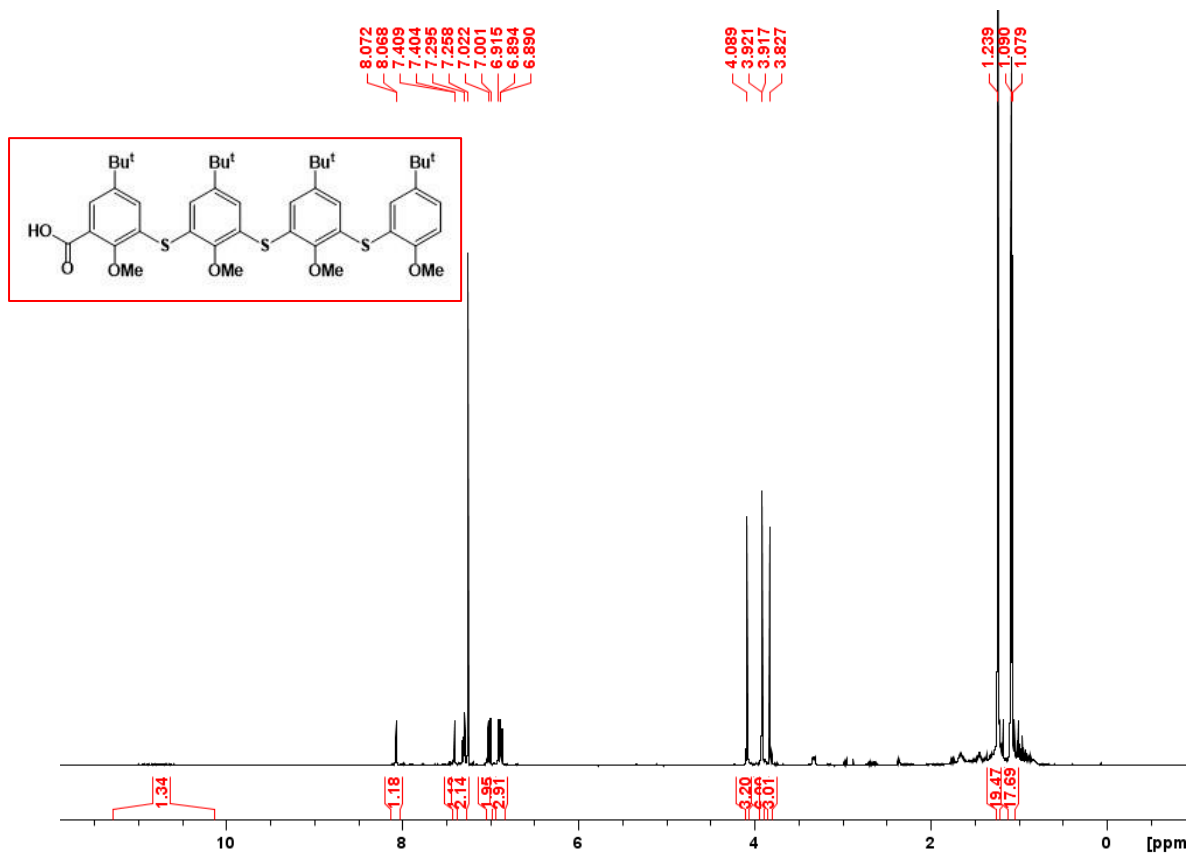

<sup>1</sup>H NMR spectrum of compound 25 (CDCl<sub>3</sub>, 298K, 400 MHz)

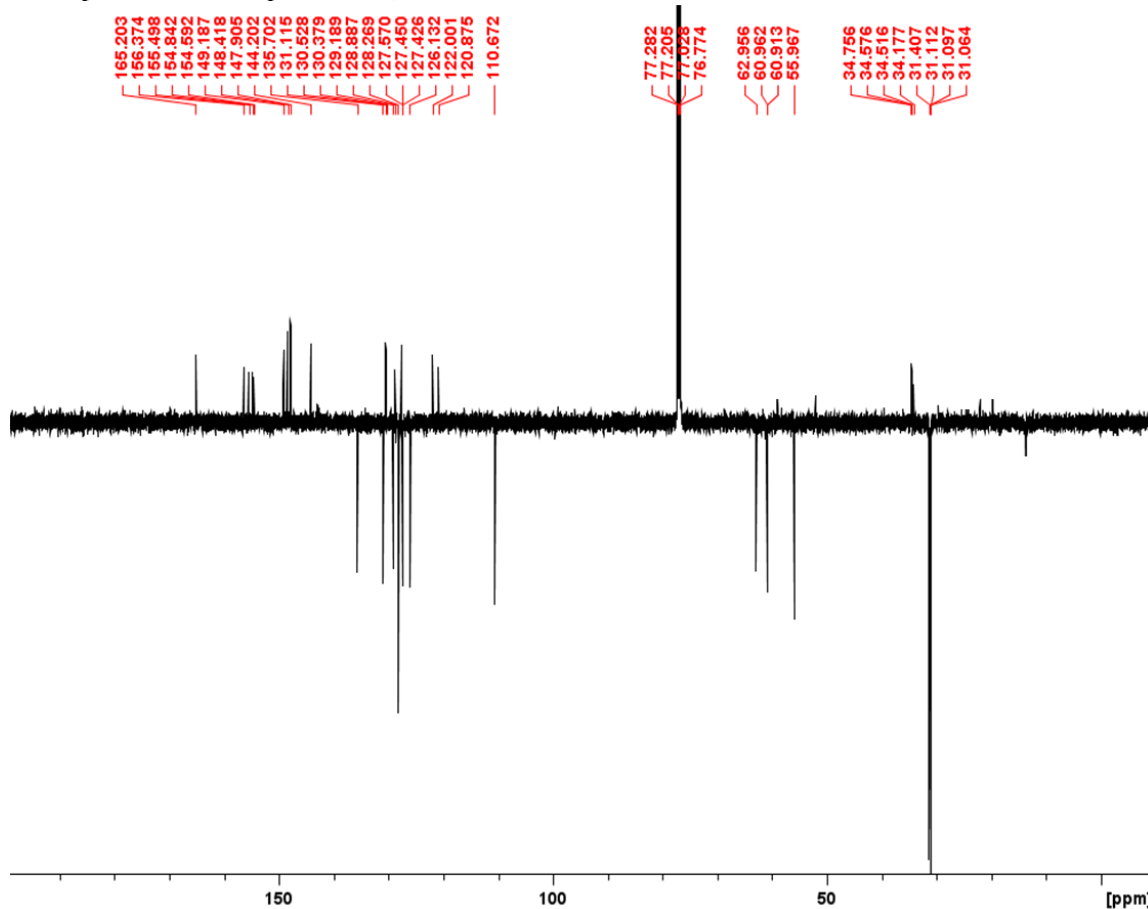

<sup>13</sup>C NMR (APT) spectrum of compound 25 (CDCl<sub>3</sub>, 298K, 100 MHz)



# Compound 25

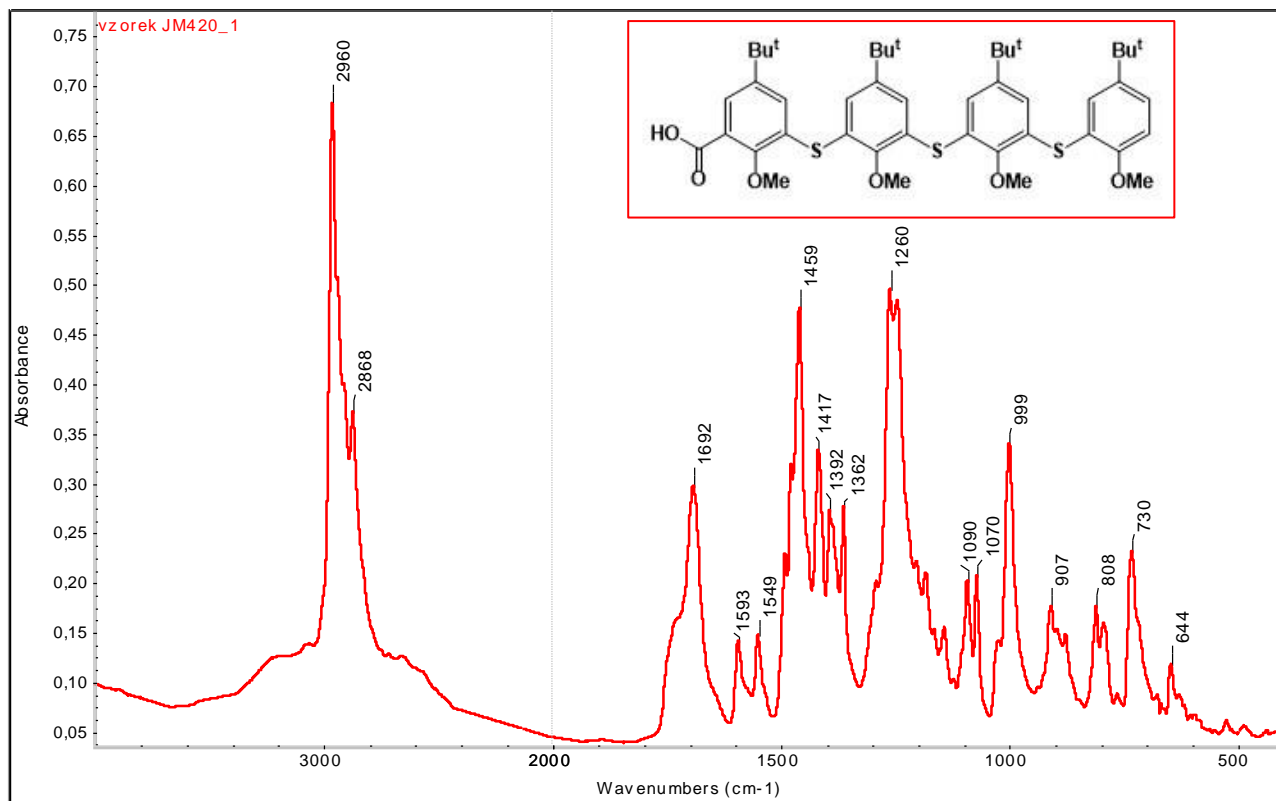

IR (ATR) spectrum of compound 25

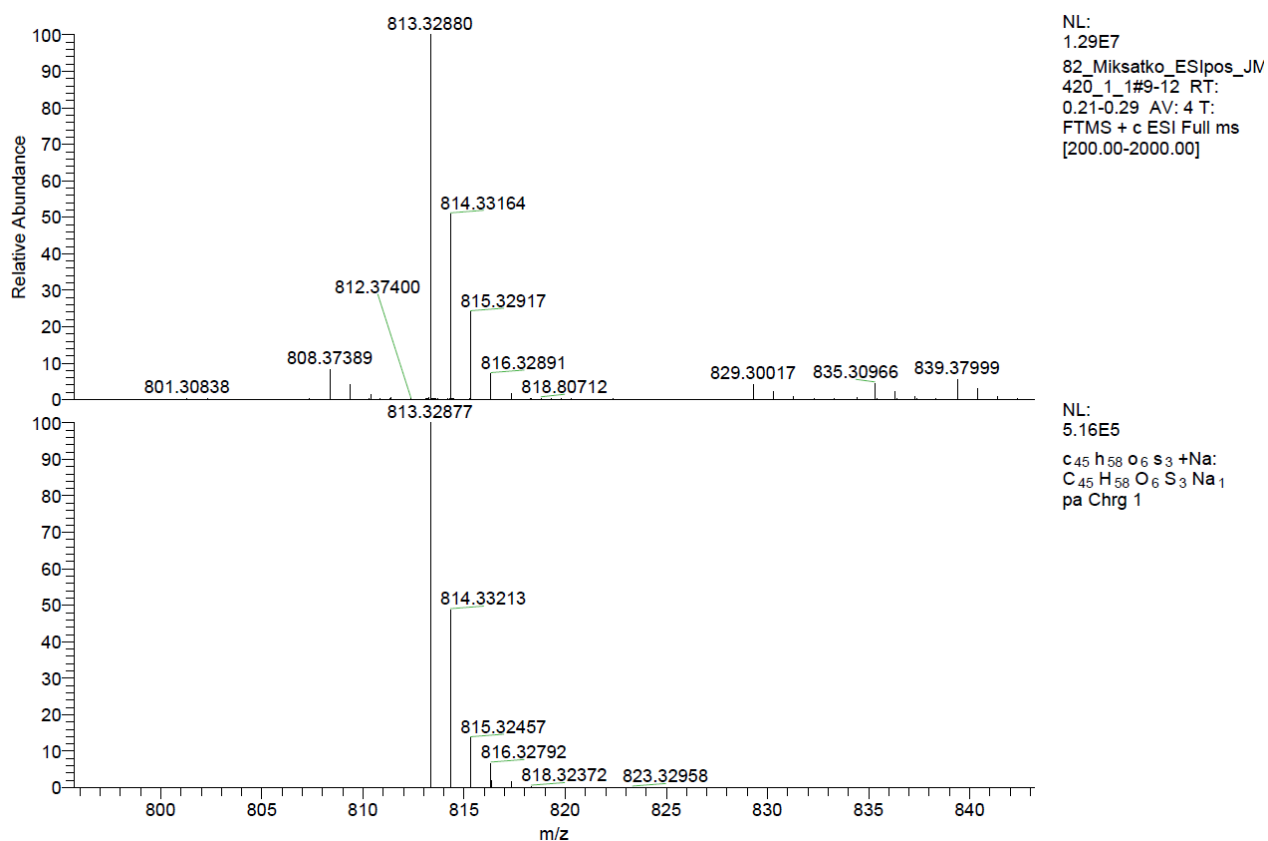

HRMS (ESI<sup>+</sup>) spectrum of compound 25

# Compound 26

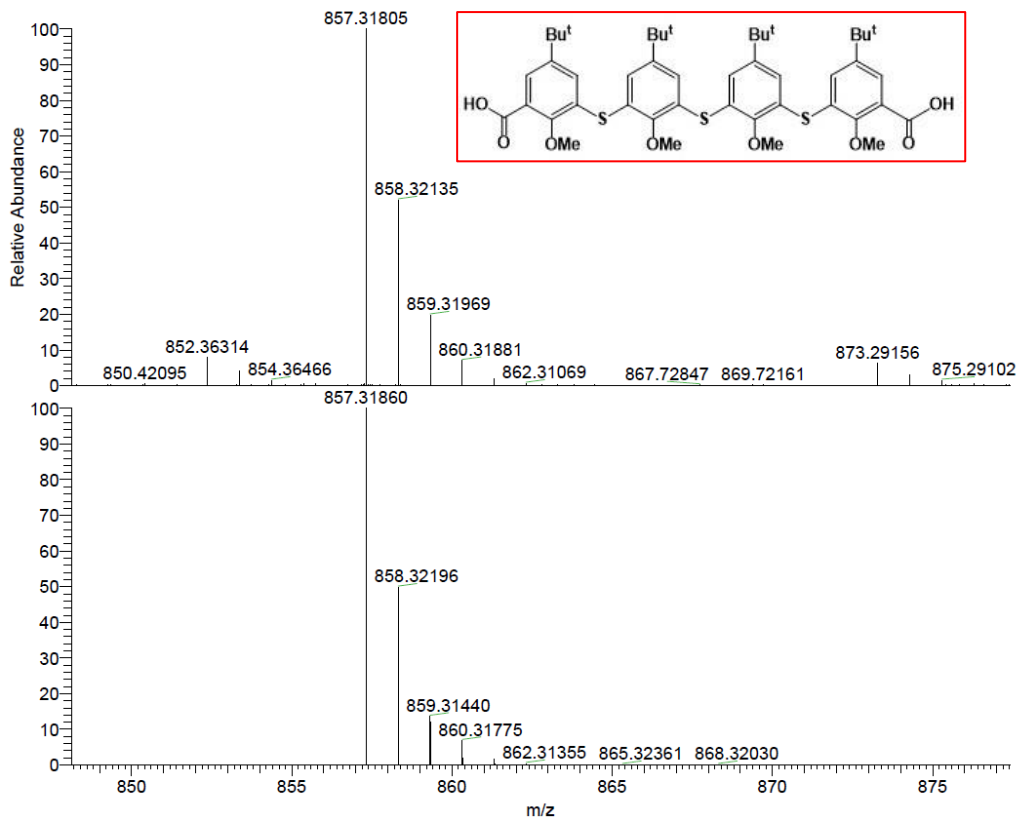

NL:  
3.08E6  
82\_Miksatko\_ESIpos\_JM  
420\_2\_1#10-12 RT:  
0.21-0.27 AV: 3 T: FTMS  
+ c ESI Full ms  
[200.00-2000.00]

NL:  
5.08E5  
C<sub>46</sub>H<sub>58</sub>S<sub>3</sub>O<sub>8</sub>+Na:  
C<sub>46</sub>H<sub>58</sub>S<sub>3</sub>O<sub>8</sub>Na<sub>1</sub>  
pa Chrg 1

HRMS (ESI<sup>+</sup>) spectrum of compound 26

## X-ray structure

Finally, the structure of the corresponding linear oligophenol ether derivative **6** was determined unambiguously using X-ray crystallography. This revealed that a monocrystal of **6** belonged to the monoclinic system, space group  $C_c$ . As shown in Fig. 1, the corresponding phenolic moieties are arranged in such a way that every succeeding unit is almost perpendicular to the previous one. Thus, according to Fig 1a, the corresponding interplanar angles  $\phi$  between the succeeding aromatic subunits were  $81.49^\circ$ ,  $70.95^\circ$ , and  $71.83^\circ$  (from the left to right).

---

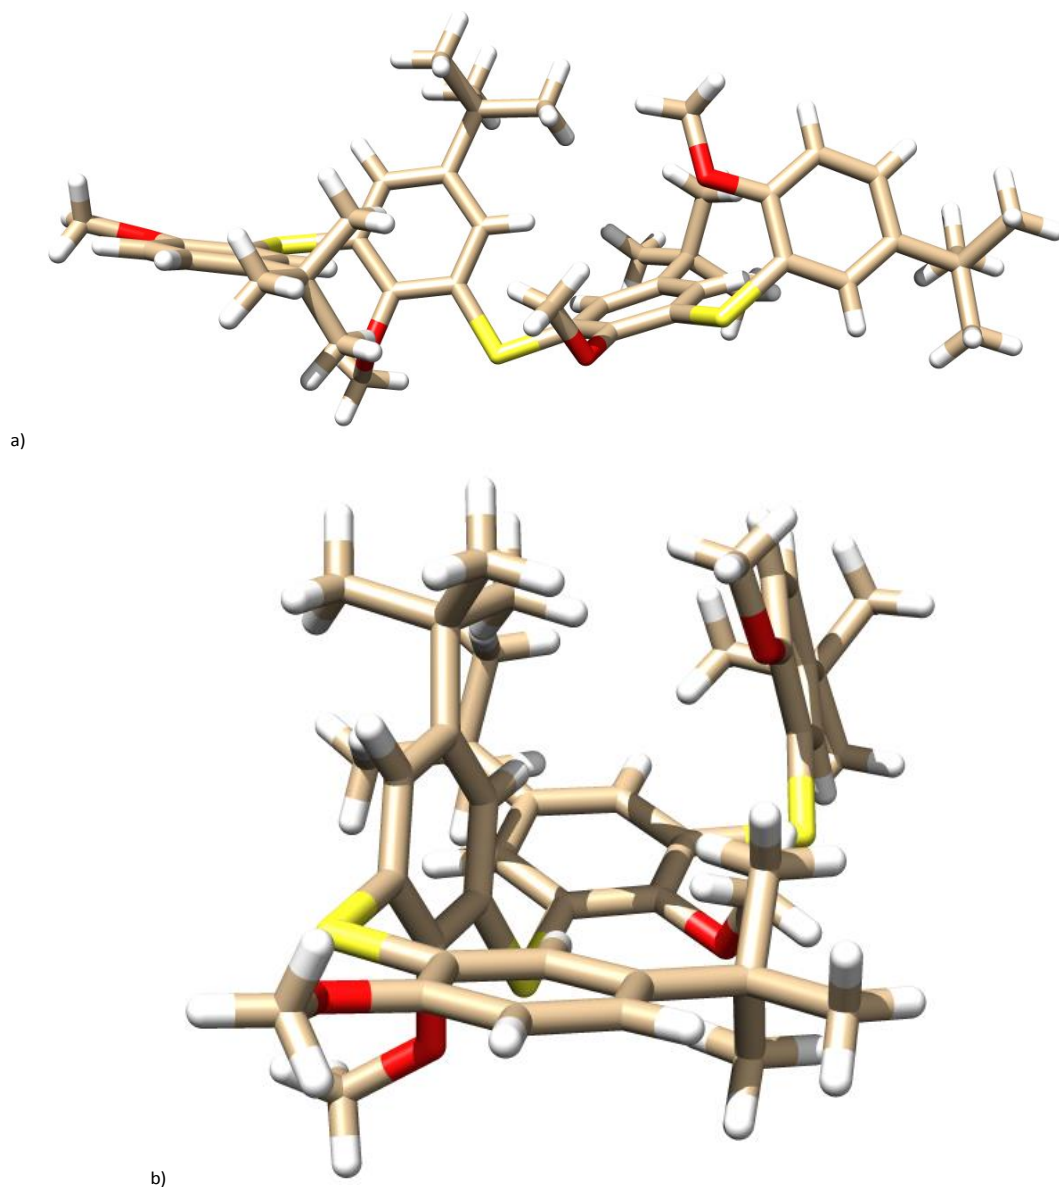

Figure: Single crystal X-ray structure of oligophenol **6**: (a) side-view, (b) front-view..

---
